# Supplementary material
Source: publisher figshare collection journal article supplement (https://acs.figshare.com/ndownloader/files/3942118)
Supplement: Supplementary file 1 [file 3942118]

 
data_bm06was 
_publ_contact_author 
; 
Thomas B. Rauchfuss
University of Illinois
A328 CLSL, Box 12-6
600 South Mathews Avenue
Urbana, IL 61801
USA
; 
_publ_contact_author_phone        '1  217 333 7355' 
_publ_contact_author_fax          '1  217 244 3186' 
_publ_contact_author_email        rauchfuz@illinois.edu 
_publ_contact_letter 
; 
Please consider this CIF submission for publication in Organometallics. 
; 
_publ_requested_journal           'Organometallics' 
_publ_requested_coeditor_name     ? 
 
_publ_section_title 
; 
Ni(I)-Ru(II) Model for the Ni-L State of [NiFe]-Hydrogenases: Synthesis
and EPR Spectroscopy
; 
 
_publ_section_abstract 
; 
This study describes the characterization of a mixed valence Ru(II)Ni(I)
 complex, a functional and structural model for the Ni-L state of the 
[NiFe]-hydrogenases.  One-electron oxidation of (cymene)Ru(�-pdt)Ni(diphos) 
[1]0 (diphos = dppe, C2H4(PPh2H)2) and [2]0 (diphos = dcpe, C2H4(P(C6H11)2)2) 
affords the mixed-valence cations [(cymene)Ru(pdt)Ni(diphos)]+ ([1]+ and [2]+).
Crystallographic and spectroscopic measurements indicate that these cations 
are described as Ru(II)-Ni(I).  Although [1]0 and [1]+ are almost 
indistinguishable structurally, the structure of the Ni center in [1]+ 
approaches that observed in the Ni-Fe hydrogenases.  In solution, [1]+
slowly converts to [H1]+ and [1-H]+, the latter being a complex of 
the thioaldehyde SCHCH2CH2S arising from C-H activation of the pdt backbone.
Treatment of  [1]+ with the H-atom abstractor TEMPO also gives [1-H]+.  
DFT calculations indicate that [1]0 is best described as Ru(II)Ni(0), 
consistent with its oxidation to Ru(II)Ni(I) in [1]+.     
; 
 
_publ_section_comment 
; 
 ? 
; 
 
_publ_section_acknowledgements 
; 
The Materials Chemistry Laboratory at the University of Illinois was 
supported in part by grants NSF CHE 95-03145 and NSF CHE 03-43032 
from the National Science Foundation. 
; 
 
 
loop_ 
 _publ_author_name 
 _publ_author_address 
'Chambers, Geoffrey M.' 
; 
University of Illinois
A331 CLSL, Box 61-6
600 South Mathews Avenue
Urbana, IL 61801
USA
;
'Angamuthu, Raja' 
; 
University of Illinois
A331 CLSL, Box 61-6
600 South Mathews Avenue
Urbana, IL 61801
USA
; 
'Gray, Danielle L.' 
; 
University of Illinois 
School of Chemical Sciences, Box 59-1 
505 South Mathews Avenue 
Urbana, Illinois  61801 
USA 
; 
'Rauchfuss, Thomas B.' 
; 
Thomas B. Rauchfuss
University of Illinois
A328 CLSL, Box 12-6
600 South Mathews Avenue
Urbana, IL 61801
USA
;
_audit_creation_method            SHELXL-97 
_audit_update_record 
; 
? 
; 
 
_chemical_name_systematic 
; 
? 
; 
 
_chemical_name_common            ? 
_chemical_melting_point          ? 
_chemical_formula_moiety         'C32 H12 B F24, C39 H44 Ni P2 Ru S2' 
_chemical_formula_sum 
 'C71 H56 B F24 Ni P2 Ru S2' 
_chemical_formula_structural     ? 
_chemical_formula_weight          1661.81 
 
_chemical_absolute_configuration ? 
_chemical_formula_iupac          ? 
_chemical_formula_analytical     ? 
_chemical_compound_source        ? 
 
loop_ 
 _atom_type_symbol 
 _atom_type_description 
 _atom_type_scat_dispersion_real 
 _atom_type_scat_dispersion_imag 
 _atom_type_scat_source 
 'C'  'C'   0.0033   0.0016 
 'International Tables Vol C Tables 4.2.6.8 and 6.1.1.4' 
 'H'  'H'   0.0000   0.0000 
 'International Tables Vol C Tables 4.2.6.8 and 6.1.1.4' 
 'B'  'B'   0.0013   0.0007 
 'International Tables Vol C Tables 4.2.6.8 and 6.1.1.4' 
 'F'  'F'   0.0171   0.0103 
 'International Tables Vol C Tables 4.2.6.8 and 6.1.1.4' 
 'P'  'P'   0.1023   0.0942 
 'International Tables Vol C Tables 4.2.6.8 and 6.1.1.4' 
 'S'  'S'   0.1246   0.1234 
 'International Tables Vol C Tables 4.2.6.8 and 6.1.1.4' 
 'Ni'  'Ni'   0.3393   1.1124 
 'International Tables Vol C Tables 4.2.6.8 and 6.1.1.4' 
 'Ru'  'Ru'  -1.2594   0.8363 
 'International Tables Vol C Tables 4.2.6.8 and 6.1.1.4' 
 
_symmetry_cell_setting           'Triclinic' 
_symmetry_space_group_name_H-M   'P-1   ' 
_symmetry_space_group_name_Hall  '-P 1' 
 
loop_ 
 _symmetry_equiv_pos_as_xyz 
 'x, y, z' 
 '-x, -y, -z' 
 
_cell_length_a                    12.7518(12) 
_cell_length_b                    16.2382(15) 
_cell_length_c                    18.3196(17) 
_cell_angle_alpha                 101.1580(10) 
_cell_angle_beta                  104.8820(10) 
_cell_angle_gamma                 93.2380(10) 
_cell_volume                      3574.2(6) 
_cell_formula_units_Z             2 
_cell_measurement_temperature     188(2) 
_cell_measurement_reflns_used    7231 
_cell_measurement_theta_min        2.21 
_cell_measurement_theta_max       22.19 
_exptl_crystal_description       'prism' 
_exptl_crystal_colour            'red' 
_exptl_crystal_size_max          0.279 
_exptl_crystal_size_mid          0.183 
_exptl_crystal_size_min          0.065 
_exptl_crystal_density_meas      ? 
_exptl_crystal_density_diffrn     1.544 
_exptl_crystal_density_method    'not measured' 
_exptl_crystal_F_000              1674 
_exptl_crystal_id                bm06was 
 
_exptl_crystal_preparation 
; 
The data crystal was mounted using oil (Parantone-N, Exxon) to a 
0.3 mm cryo-loop (Hampton Research) with the (-1, 1, -1) scattering 
planes roughly normal to the spindle axis. 
; 
_exptl_absorpt_coefficient_mu     0.682 
_exptl_absorpt_correction_type   'integration' 
_exptl_absorpt_correction_T_min  0.9229 
_exptl_absorpt_correction_T_max  0.9985 
_exptl_absorpt_process_details   'SHELXTL/XPREP V2005/2 (Bruker, 2005)' 
 
_exptl_special_details 
; 
One distinct cell was identified using APEX2 (Bruker, 2010).  Four 
frame series were integrated and filtered for statistical outliers 
using SAINT (Bruker, 2005) then corrected for absorption by 
integration using SHELXTL/XPREP V2005/2 (Bruker, 2005) before using 
SAINT/SADABS (Bruker, 2005) to sort, merge, and scale 
the combined data.  No decay correction was applied. 
; 
 
_diffrn_ambient_temperature       188(2) 
_diffrn_radiation_wavelength      0.71073 
_diffrn_radiation_wavelength_id  bm06was 
_diffrn_radiation_type           'MoK\a' 
_diffrn_radiation_source         'normal-focus sealed tube' 
_diffrn_radiation_monochromator  'graphite' 
_diffrn_measurement_device_type   ? 
_diffrn_measurement_device       'Siemens Platform/ApexII CCD' 
_diffrn_measurement_method       'profile data from \f and \w scans' 
_diffrn_detector_area_resol_mean  ? 
_diffrn_reflns_number            39962 
 
_diffrn_reflns_av_R_equivalents   0.0438 
_diffrn_reflns_av_sigmaI/netI     0.0536 
_diffrn_reflns_limit_h_min        -15 
_diffrn_reflns_limit_h_max        15 
_diffrn_reflns_limit_k_min        -19 
_diffrn_reflns_limit_k_max        19 
_diffrn_reflns_limit_l_min        -22 
_diffrn_reflns_limit_l_max        22 
_diffrn_reflns_theta_min          1.55 
_diffrn_reflns_theta_max          25.60 
_reflns_number_total              13393 
_reflns_number_gt                 9398 
_reflns_threshold_expression      >2sigma(I) 
 
_computing_data_collection       'APEX2 V2010.11-3 (Bruker, 2010)' 
 
_computing_cell_refinement       'SAINT V7.68A (Bruker, 2005)' 
_computing_data_reduction 
; 
SAINT V7.68A, XPREP V2005/2, SADABS V2008/2, TWINABS V2008/2 
(Bruker, 2005 & 2008) 
; 
_computing_structure_solution    'SHELXTL V6.12 (Bruker, 2005)' 
_computing_structure_refinement  'SHELXTL V6.12 (Bruker, 2005)' 
_computing_molecular_graphics 
; 
SHELXTL V6.12 (Bruker, 2005), CrystalMaker v2.1.3 (CrystalMaker, 1994) 
; 
_computing_publication_material  'XCIF V6.12 (Bruker, 2005)' 
 
_refine_special_details 
; 
Structure was phased by direct methods (Sheldrick, 2008).  Systematic 
conditions suggested the ambiguous space group. The space group choice 
was confirmed by successful convergence of the full-matrix least-squares 
refinement on F^2^.  The final map had no significant features.  A final 
analysis of variance between observed and calculated structure factors 
showed little dependence on amplitude and resolution. 
; 
 
_refine_ls_structure_factor_coef  Fsqd 
_refine_ls_matrix_type            full 
_refine_ls_weighting_scheme       calc 
_refine_ls_weighting_details 
 'calc w=1/[\s^2^(Fo^2^)+(0.0510P)^2^+6.5267P] where P=(Fo^2^+2Fc^2^)/3' 
_atom_sites_solution_primary      direct 
_atom_sites_solution_secondary    difmap 
_atom_sites_solution_hydrogens    geom 
_refine_ls_hydrogen_treatment    noref 
_refine_ls_extinction_method      none 
_refine_ls_extinction_coef        ? 
_refine_ls_number_reflns          13393 
_refine_ls_number_parameters      1404 
_refine_ls_number_restraints      4218 
_refine_ls_R_factor_all           0.0836 
_refine_ls_R_factor_gt            0.0537 
_refine_ls_wR_factor_ref          0.1352 
_refine_ls_wR_factor_gt           0.1199 
_refine_ls_goodness_of_fit_ref    1.024 
_refine_ls_restrained_S_all       1.359 
_refine_ls_shift/su_max           0.009 
_refine_ls_shift/su_mean          0.000 
 
_refine_ls_abs_structure_details ? 
loop_ 
 _atom_site_label 
 _atom_site_type_symbol 
 _atom_site_fract_x 
 _atom_site_fract_y 
 _atom_site_fract_z 
 _atom_site_U_iso_or_equiv 
 _atom_site_adp_type 
 _atom_site_occupancy 
 _atom_site_symmetry_multiplicity 
 _atom_site_calc_flag 
 _atom_site_refinement_flags 
 _atom_site_disorder_assembly 
 _atom_site_disorder_group 
Ru1 Ru -0.09363(4) 0.14402(3) 0.68141(3) 0.04161(16) Uani 1 1 d D A . 
Ni1 Ni 0.02909(6) 0.03710(5) 0.72889(4) 0.0354(2) Uani 1 1 d D . . 
S1 S -0.0102(6) 0.0519(5) 0.6058(2) 0.0460(13) Uani 0.688(19) 1 d PDU A 1 
S2 S 0.0740(5) 0.1788(3) 0.7741(4) 0.0416(12) Uani 0.688(19) 1 d PDU A 1 
C27 C 0.1177(11) 0.1042(10) 0.5989(8) 0.060(3) Uani 0.688(19) 1 d PDU A 1 
H27A H 0.1776 0.0704 0.6169 0.072 Uiso 0.688(19) 1 calc PR A 1 
H27B H 0.1112 0.1035 0.5438 0.072 Uiso 0.688(19) 1 calc PR A 1 
C28 C 0.1496(10) 0.1942(9) 0.6443(10) 0.058(3) Uani 0.688(19) 1 d PDU A 1 
H28A H 0.2111 0.2189 0.6287 0.070 Uiso 0.688(19) 1 calc PR A 1 
H28B H 0.0872 0.2269 0.6298 0.070 Uiso 0.688(19) 1 calc PR A 1 
C29 C 0.1826(8) 0.2051(9) 0.7307(9) 0.055(3) Uani 0.688(19) 1 d PDU A 1 
H29A H 0.2131 0.2646 0.7540 0.066 Uiso 0.688(19) 1 calc PR A 1 
H29B H 0.2418 0.1694 0.7449 0.066 Uiso 0.688(19) 1 calc PR A 1 
S1B S 0.0211(12) 0.0756(10) 0.6161(6) 0.055(3) Uani 0.312(19) 1 d PDU A 2 
S2B S 0.0610(10) 0.1770(6) 0.7878(7) 0.052(3) Uani 0.312(19) 1 d PDU A 2 
C27B C 0.1489(19) 0.140(2) 0.6261(17) 0.057(4) Uani 0.312(19) 1 d PDU A 2 
H27C H 0.2104 0.1070 0.6413 0.069 Uiso 0.312(19) 1 calc PR A 2 
H27D H 0.1484 0.1516 0.5748 0.069 Uiso 0.312(19) 1 calc PR A 2 
C28B C 0.170(2) 0.2238(17) 0.6837(19) 0.058(4) Uani 0.312(19) 1 d PDU A 2 
H28C H 0.2371 0.2552 0.6802 0.070 Uiso 0.312(19) 1 calc PR A 2 
H28D H 0.1089 0.2571 0.6684 0.070 Uiso 0.312(19) 1 calc PR A 2 
C29B C 0.1847(16) 0.2190(18) 0.7667(17) 0.052(4) Uani 0.312(19) 1 d PDU A 2 
H29C H 0.2094 0.2763 0.7995 0.062 Uiso 0.312(19) 1 calc PR A 2 
H29D H 0.2432 0.1829 0.7814 0.062 Uiso 0.312(19) 1 calc PR A 2 
P1 P 0.16575(11) -0.04313(9) 0.75438(8) 0.0319(3) Uani 1 1 d . A . 
P2 P -0.02267(11) 0.00069(9) 0.82706(8) 0.0322(3) Uani 1 1 d . A . 
C1 C 0.3020(4) 0.0085(3) 0.7687(3) 0.0326(12) Uani 1 1 d . . . 
C2 C 0.3493(5) 0.0021(4) 0.7075(3) 0.0378(13) Uani 1 1 d . A . 
H2A H 0.3138 -0.0350 0.6594 0.045 Uiso 1 1 calc R . . 
C3 C 0.4473(5) 0.0493(4) 0.7157(4) 0.0463(15) Uani 1 1 d . . . 
H3A H 0.4785 0.0452 0.6735 0.056 Uiso 1 1 calc R A . 
C4 C 0.4990(5) 0.1021(4) 0.7858(4) 0.0502(17) Uani 1 1 d . A . 
H4A H 0.5660 0.1347 0.7917 0.060 Uiso 1 1 calc R . . 
C5 C 0.4548(5) 0.1082(4) 0.8475(4) 0.0501(16) Uani 1 1 d . . . 
H5A H 0.4923 0.1440 0.8958 0.060 Uiso 1 1 calc R A . 
C6 C 0.3561(5) 0.0624(4) 0.8393(4) 0.0425(14) Uani 1 1 d . A . 
H6A H 0.3252 0.0676 0.8817 0.051 Uiso 1 1 calc R . . 
C7 C 0.1592(4) -0.1419(4) 0.6864(3) 0.0332(12) Uani 1 1 d . . . 
C8 C 0.0920(5) -0.1550(4) 0.6114(4) 0.0492(16) Uani 1 1 d . A . 
H8A H 0.0503 -0.1116 0.5958 0.059 Uiso 1 1 calc R . . 
C9 C 0.0850(6) -0.2300(4) 0.5593(4) 0.061(2) Uani 1 1 d . . . 
H9A H 0.0386 -0.2380 0.5082 0.073 Uiso 1 1 calc R A . 
C10 C 0.1449(5) -0.2935(4) 0.5811(4) 0.0521(17) Uani 1 1 d . A . 
H10A H 0.1395 -0.3454 0.5453 0.063 Uiso 1 1 calc R . . 
C11 C 0.2122(5) -0.2814(4) 0.6546(4) 0.0471(16) Uani 1 1 d . . . 
H11A H 0.2538 -0.3251 0.6696 0.057 Uiso 1 1 calc R A . 
C12 C 0.2203(5) -0.2062(4) 0.7072(4) 0.0413(14) Uani 1 1 d . A . 
H12A H 0.2678 -0.1983 0.7579 0.050 Uiso 1 1 calc R . . 
C13 C 0.1677(5) -0.0733(4) 0.8475(3) 0.0363(13) Uani 1 1 d . . . 
H13A H 0.1329 -0.1320 0.8371 0.044 Uiso 1 1 calc R A . 
H13B H 0.2442 -0.0711 0.8785 0.044 Uiso 1 1 calc R . . 
C14 C 0.1070(4) -0.0138(4) 0.8933(3) 0.0357(13) Uani 1 1 d . A . 
H14A H 0.1519 0.0413 0.9163 0.043 Uiso 1 1 calc R . . 
H14B H 0.0925 -0.0382 0.9358 0.043 Uiso 1 1 calc R . . 
C15 C -0.0894(5) 0.0679(4) 0.8882(3) 0.0361(13) Uani 1 1 d . . . 
C16 C -0.0368(5) 0.1458(4) 0.9317(4) 0.0453(15) Uani 1 1 d . A . 
H16A H 0.0360 0.1619 0.9317 0.054 Uiso 1 1 calc R . . 
C17 C -0.0884(6) 0.2007(5) 0.9752(4) 0.0560(18) Uani 1 1 d . . . 
H17A H -0.0507 0.2536 1.0049 0.067 Uiso 1 1 calc R A . 
C18 C -0.1936(6) 0.1788(5) 0.9756(4) 0.0577(19) Uani 1 1 d . A . 
H18A H -0.2291 0.2167 1.0050 0.069 Uiso 1 1 calc R . . 
C19 C -0.2480(5) 0.1011(5) 0.9329(4) 0.0513(17) Uani 1 1 d . . . 
H19A H -0.3206 0.0855 0.9335 0.062 Uiso 1 1 calc R A . 
C20 C -0.1966(5) 0.0463(4) 0.8894(3) 0.0407(14) Uani 1 1 d . A . 
H20A H -0.2346 -0.0065 0.8600 0.049 Uiso 1 1 calc R . . 
C21 C -0.0969(5) -0.1041(4) 0.8027(4) 0.0402(14) Uani 1 1 d . . . 
C22 C -0.1308(5) -0.1472(4) 0.7263(4) 0.0557(18) Uani 1 1 d . A . 
H22A H -0.1221 -0.1200 0.6864 0.067 Uiso 1 1 calc R . . 
C23 C -0.1782(6) -0.2315(5) 0.7080(5) 0.076(2) Uani 1 1 d . . . 
H23A H -0.2008 -0.2619 0.6557 0.092 Uiso 1 1 calc R A . 
C24 C -0.1917(6) -0.2695(5) 0.7658(6) 0.077(3) Uani 1 1 d . A . 
H24A H -0.2234 -0.3266 0.7530 0.092 Uiso 1 1 calc R . . 
C25 C -0.1612(6) -0.2279(5) 0.8407(6) 0.072(2) Uani 1 1 d . . . 
H25A H -0.1723 -0.2554 0.8798 0.087 Uiso 1 1 calc R A . 
C26 C -0.1135(5) -0.1449(4) 0.8600(4) 0.0547(18) Uani 1 1 d . A . 
H26A H -0.0920 -0.1156 0.9126 0.066 Uiso 1 1 calc R . . 
C30 C -0.1863(10) 0.2458(7) 0.7253(9) 0.0462(18) Uani 0.812(10) 1 d PDU A 1 
C31 C -0.2189(10) 0.1698(9) 0.7438(9) 0.047(2) Uani 0.812(10) 1 d PDU A 1 
H31A H -0.2166 0.1688 0.7958 0.056 Uiso 0.812(10) 1 calc PR A 1 
C32 C -0.2549(7) 0.0951(9) 0.6859(8) 0.048(2) Uani 0.812(10) 1 d PDU A 1 
H32A H -0.2749 0.0442 0.6997 0.058 Uiso 0.812(10) 1 calc PR A 1 
C33 C -0.2616(7) 0.0953(8) 0.6076(8) 0.053(2) Uani 0.812(10) 1 d PDU A 1 
C34 C -0.2272(10) 0.1719(8) 0.5899(7) 0.049(2) Uani 0.812(10) 1 d PDU A 1 
H34A H -0.2294 0.1729 0.5378 0.059 Uiso 0.812(10) 1 calc PR A 1 
C35 C -0.1901(10) 0.2460(6) 0.6472(9) 0.0461(19) Uani 0.812(10) 1 d PDU A 1 
H35A H -0.1675 0.2965 0.6337 0.055 Uiso 0.812(10) 1 calc PR A 1 
C36 C -0.1398(11) 0.3225(8) 0.7914(9) 0.058(3) Uani 0.812(10) 1 d PDU A 1 
H36A H -0.0962 0.3027 0.8371 0.069 Uiso 0.812(10) 1 calc PR A 1 
C37 C -0.2387(9) 0.3607(7) 0.8118(7) 0.095(4) Uani 0.812(10) 1 d PDU A 1 
H37A H -0.2136 0.4054 0.8589 0.142 Uiso 0.812(10) 1 calc PR A 1 
H37B H -0.2868 0.3166 0.8206 0.142 Uiso 0.812(10) 1 calc PR A 1 
H37C H -0.2789 0.3847 0.7691 0.142 Uiso 0.812(10) 1 calc PR A 1 
C38 C -0.0693(9) 0.3865(6) 0.7728(6) 0.082(3) Uani 0.812(10) 1 d PDU A 1 
H38A H -0.0113 0.3595 0.7544 0.124 Uiso 0.812(10) 1 calc PR A 1 
H38B H -0.0367 0.4307 0.8192 0.124 Uiso 0.812(10) 1 calc PR A 1 
H38C H -0.1133 0.4117 0.7323 0.124 Uiso 0.812(10) 1 calc PR A 1 
C39 C -0.3042(9) 0.0165(8) 0.5434(8) 0.075(3) Uani 0.812(10) 1 d PDU A 1 
H39A H -0.3756 0.0241 0.5109 0.112 Uiso 0.812(10) 1 calc PR A 1 
H39B H -0.3116 -0.0326 0.5663 0.112 Uiso 0.812(10) 1 calc PR A 1 
H39C H -0.2528 0.0073 0.5118 0.112 Uiso 0.812(10) 1 calc PR A 1 
C30B C -0.259(2) 0.102(3) 0.603(3) 0.053(4) Uani 0.188(10) 1 d PDU A 2 
C31B C -0.219(4) 0.178(3) 0.587(3) 0.050(4) Uani 0.188(10) 1 d PDU A 2 
H31B H -0.2178 0.1796 0.5359 0.060 Uiso 0.188(10) 1 calc PR A 2 
C32B C -0.180(4) 0.2504(19) 0.647(3) 0.048(4) Uani 0.188(10) 1 d PDU A 2 
H32B H -0.1530 0.3007 0.6353 0.058 Uiso 0.188(10) 1 calc PR A 2 
C33B C -0.181(4) 0.249(2) 0.724(4) 0.049(4) Uani 0.188(10) 1 d PDU A 2 
C34B C -0.224(4) 0.174(3) 0.739(4) 0.048(4) Uani 0.188(10) 1 d PDU A 2 
H34B H -0.2272 0.1720 0.7895 0.057 Uiso 0.188(10) 1 calc PR A 2 
C35B C -0.262(2) 0.101(3) 0.680(3) 0.050(4) Uani 0.188(10) 1 d PDU A 2 
H35B H -0.2890 0.0506 0.6910 0.060 Uiso 0.188(10) 1 calc PR A 2 
C36B C -0.281(3) 0.021(2) 0.540(3) 0.061(5) Uani 0.188(10) 1 d PDU A 2 
H36B H -0.2509 0.0306 0.4964 0.074 Uiso 0.188(10) 1 calc PR A 2 
C37B C -0.407(2) 0.006(2) 0.512(2) 0.067(9) Uani 0.188(10) 1 d PDU A 2 
H37D H -0.4296 -0.0530 0.4850 0.101 Uiso 0.188(10) 1 calc PR A 2 
H37E H -0.4333 0.0429 0.4757 0.101 Uiso 0.188(10) 1 calc PR A 2 
H37F H -0.4369 0.0193 0.5560 0.101 Uiso 0.188(10) 1 calc PR A 2 
C38B C -0.239(3) -0.054(2) 0.567(2) 0.072(9) Uani 0.188(10) 1 d PDU A 2 
H38D H -0.2627 -0.0593 0.6134 0.108 Uiso 0.188(10) 1 calc PR A 2 
H38E H -0.1592 -0.0473 0.5806 0.108 Uiso 0.188(10) 1 calc PR A 2 
H38F H -0.2678 -0.1048 0.5266 0.108 Uiso 0.188(10) 1 calc PR A 2 
C39B C -0.159(6) 0.331(3) 0.786(4) 0.067(7) Uani 0.188(10) 1 d PDU A 2 
H39D H -0.0832 0.3546 0.7975 0.100 Uiso 0.188(10) 1 calc PR A 2 
H39E H -0.1732 0.3180 0.8332 0.100 Uiso 0.188(10) 1 calc PR A 2 
H39F H -0.2079 0.3713 0.7676 0.100 Uiso 0.188(10) 1 calc PR A 2 
B1 B 0.4798(5) 0.5568(3) 0.7580(3) 0.0325(14) Uani 1 1 d D . . 
C56 C 0.3458(4) 0.5412(3) 0.7416(3) 0.0336(12) Uani 1 1 d . B . 
C57 C 0.2928(5) 0.5807(4) 0.7943(4) 0.0407(14) Uani 1 1 d . . . 
H57A H 0.3358 0.6137 0.8425 0.049 Uiso 1 1 calc R B . 
C58 C 0.1801(5) 0.5740(4) 0.7793(4) 0.0457(15) Uani 1 1 d . B . 
C59 C 0.1142(5) 0.5238(4) 0.7111(4) 0.0469(16) Uani 1 1 d . . . 
H59A H 0.0369 0.5181 0.7009 0.056 Uiso 1 1 calc R B . 
C60 C 0.1643(5) 0.4824(4) 0.6585(4) 0.0397(14) Uani 1 1 d . B . 
C61 C 0.2774(4) 0.4925(3) 0.6727(3) 0.0360(13) Uani 1 1 d . . . 
H61A H 0.3091 0.4654 0.6342 0.043 Uiso 1 1 calc R B . 
C62 C 0.1282(5) 0.6232(4) 0.8359(4) 0.062(2) Uani 1 1 d D . . 
C63 C 0.0990(4) 0.4255(4) 0.5839(4) 0.0577(19) Uani 1 1 d D . . 
C64 C 0.5434(4) 0.5326(3) 0.8393(3) 0.0320(12) Uani 1 1 d . B . 
C65 C 0.5031(5) 0.4650(3) 0.8649(3) 0.0349(13) Uani 1 1 d . . . 
H65A H 0.4318 0.4377 0.8384 0.042 Uiso 1 1 calc R B . 
C66 C 0.5630(5) 0.4361(4) 0.9274(3) 0.0405(14) Uani 1 1 d . B . 
C67 C 0.6635(6) 0.4772(4) 0.9705(4) 0.0551(18) Uani 1 1 d . . . 
H67A H 0.7032 0.4589 1.0149 0.066 Uiso 1 1 calc R B . 
C68 C 0.7057(5) 0.5453(4) 0.9481(4) 0.0517(17) Uani 1 1 d . B . 
C69 C 0.6475(5) 0.5714(4) 0.8829(3) 0.0414(14) Uani 1 1 d . . . 
H69A H 0.6794 0.6170 0.8673 0.050 Uiso 1 1 calc R B . 
C70 C 0.5235(5) 0.3566(4) 0.9453(3) 0.0529(17) Uani 1 1 d D . . 
C71 C 0.8149(7) 0.5927(5) 0.9941(4) 0.089(3) Uani 1 1 d D . . 
C40 C 0.5176(14) 0.4934(7) 0.6878(9) 0.027(2) Uani 0.577(10) 1 d PGDU B 1 
C41 C 0.4808(15) 0.4081(8) 0.6744(10) 0.033(3) Uani 0.577(10) 1 d PGDU B 1 
H41A H 0.4307 0.3901 0.7001 0.040 Uiso 0.577(10) 1 calc PR B 1 
C42 C 0.517(2) 0.3493(7) 0.6233(17) 0.038(3) Uani 0.577(10) 1 d PGDU B 1 
C43 C 0.591(4) 0.3757(7) 0.586(2) 0.042(2) Uani 0.577(10) 1 d PGDU B 1 
H43A H 0.6156 0.3354 0.5508 0.051 Uiso 0.577(10) 1 calc PR B 1 
C44 C 0.627(4) 0.4609(8) 0.599(2) 0.041(2) Uani 0.577(10) 1 d PGDU B 1 
C45 C 0.591(2) 0.5198(6) 0.6502(16) 0.037(3) Uani 0.577(10) 1 d PGDU B 1 
H45A H 0.6161 0.5780 0.6593 0.045 Uiso 0.577(10) 1 calc PR B 1 
C46 C 0.4784(6) 0.2582(6) 0.6120(4) 0.051(3) Uani 0.577(10) 1 d PDU B 1 
C47 C 0.7037(7) 0.4897(5) 0.5589(5) 0.057(3) Uani 0.577(10) 1 d PDU B 1 
F1 F 0.4541(8) 0.2346(5) 0.6722(4) 0.063(2) Uani 0.577(10) 1 d PDU B 1 
F2 F 0.5379(9) 0.2035(8) 0.5827(6) 0.058(3) Uani 0.577(10) 1 d PDU B 1 
F3 F 0.3769(5) 0.2432(6) 0.5585(5) 0.050(2) Uani 0.577(10) 1 d PDU B 1 
F4 F 0.7991(6) 0.5291(7) 0.6080(5) 0.086(3) Uani 0.577(10) 1 d PDU B 1 
F5 F 0.6658(7) 0.5509(6) 0.5219(6) 0.074(3) Uani 0.577(10) 1 d PDU B 1 
F6 F 0.7292(9) 0.4316(5) 0.5075(6) 0.088(3) Uani 0.577(10) 1 d PDU B 1 
C40B C 0.531(2) 0.4912(10) 0.6967(13) 0.035(4) Uani 0.423(10) 1 d PGDU B 2 
C41B C 0.495(2) 0.4059(11) 0.6830(14) 0.031(3) Uani 0.423(10) 1 d PGDU B 2 
H41B H 0.4485 0.3872 0.7113 0.038 Uiso 0.423(10) 1 calc PR B 2 
C42B C 0.525(3) 0.3480(10) 0.628(2) 0.039(3) Uani 0.423(10) 1 d PGDU B 2 
C43B C 0.593(5) 0.3754(10) 0.587(3) 0.042(3) Uani 0.423(10) 1 d PGDU B 2 
H43B H 0.6138 0.3358 0.5491 0.050 Uiso 0.423(10) 1 calc PR B 2 
C44B C 0.629(5) 0.4607(11) 0.600(3) 0.041(3) Uani 0.423(10) 1 d PGDU B 2 
C45B C 0.599(3) 0.5186(9) 0.655(2) 0.034(3) Uani 0.423(10) 1 d PGDU B 2 
H45B H 0.6237 0.5769 0.6647 0.041 Uiso 0.423(10) 1 calc PR B 2 
C46B C 0.4773(15) 0.2584(11) 0.6108(10) 0.050(3) Uani 0.423(10) 1 d PDU B 2 
C47B C 0.7060(15) 0.4887(12) 0.5599(11) 0.057(3) Uani 0.423(10) 1 d PDU B 2 
F1B F 0.5183(11) 0.2345(7) 0.6803(5) 0.064(3) Uani 0.423(10) 1 d PDU B 2 
F2B F 0.5206(12) 0.2068(10) 0.5625(7) 0.044(3) Uani 0.423(10) 1 d PDU B 2 
F3B F 0.3728(7) 0.2401(10) 0.5875(8) 0.066(4) Uani 0.423(10) 1 d PDU B 2 
F4B F 0.8029(7) 0.4660(9) 0.5852(7) 0.082(3) Uani 0.423(10) 1 d PDU B 2 
F5B F 0.7154(12) 0.5711(5) 0.5617(8) 0.077(3) Uani 0.423(10) 1 d PDU B 2 
F6B F 0.6756(11) 0.4499(8) 0.4836(5) 0.074(3) Uani 0.423(10) 1 d PDU B 2 
C48 C 0.4982(6) 0.6602(4) 0.7612(10) 0.031(2) Uani 0.589(11) 1 d PDU B 1 
C49 C 0.4957(11) 0.6947(7) 0.6965(9) 0.032(2) Uani 0.589(11) 1 d PDU B 1 
H49A H 0.4817 0.6576 0.6473 0.039 Uiso 0.589(11) 1 calc PR B 1 
C50 C 0.513(2) 0.7810(8) 0.7014(8) 0.038(2) Uani 0.589(11) 1 d PDU B 1 
C51 C 0.533(4) 0.8374(8) 0.7713(9) 0.040(2) Uani 0.589(11) 1 d PDU B 1 
H51A H 0.5451 0.8964 0.7746 0.048 Uiso 0.589(11) 1 calc PR B 1 
C52 C 0.536(4) 0.8056(7) 0.8368(9) 0.038(2) Uani 0.589(11) 1 d PDU B 1 
C53 C 0.519(2) 0.7194(8) 0.8314(10) 0.034(2) Uani 0.589(11) 1 d PDU B 1 
H53A H 0.5219 0.6996 0.8772 0.041 Uiso 0.589(11) 1 calc PR B 1 
C54 C 0.5507(7) 0.8632(5) 0.9126(6) 0.054(3) Uani 0.589(11) 1 d PDU B 1 
C55 C 0.5124(6) 0.8117(5) 0.6294(5) 0.050(3) Uani 0.589(11) 1 d PDU B 1 
F7 F 0.4548(6) 0.8703(7) 0.9322(6) 0.087(3) Uani 0.589(11) 1 d PDU B 1 
F8 F 0.6115(9) 0.8373(6) 0.9724(4) 0.078(3) Uani 0.589(11) 1 d PDU B 1 
F9 F 0.5909(10) 0.9419(4) 0.9177(5) 0.075(3) Uani 0.589(11) 1 d PDU B 1 
F10 F 0.5789(8) 0.8855(5) 0.6475(7) 0.061(3) Uani 0.589(11) 1 d PDU B 1 
F11 F 0.4144(6) 0.8291(7) 0.5938(6) 0.065(3) Uani 0.589(11) 1 d PDU B 1 
F12 F 0.5456(9) 0.7564(6) 0.5786(6) 0.054(3) Uani 0.589(11) 1 d PDU B 1 
C48B C 0.5109(7) 0.6596(5) 0.7642(14) 0.028(3) Uani 0.411(11) 1 d PDU B 2 
C49B C 0.5074(16) 0.6939(10) 0.6993(13) 0.037(3) Uani 0.411(11) 1 d PDU B 2 
H49B H 0.4978 0.6567 0.6507 0.045 Uiso 0.411(11) 1 calc PR B 2 
C50B C 0.518(3) 0.7803(10) 0.7036(11) 0.038(3) Uani 0.411(11) 1 d PDU B 2 
C51B C 0.532(5) 0.8369(11) 0.7727(12) 0.041(3) Uani 0.411(11) 1 d PDU B 2 
H51B H 0.5386 0.8960 0.7753 0.049 Uiso 0.411(11) 1 calc PR B 2 
C52B C 0.535(6) 0.8053(10) 0.8384(12) 0.039(3) Uani 0.411(11) 1 d PDU B 2 
C53B C 0.525(3) 0.7189(10) 0.8336(14) 0.035(3) Uani 0.411(11) 1 d PDU B 2 
H53B H 0.5282 0.6990 0.8795 0.041 Uiso 0.411(11) 1 calc PR B 2 
C54B C 0.5504(17) 0.8628(12) 0.9144(11) 0.054(3) Uani 0.411(11) 1 d PDU B 2 
C55B C 0.5120(16) 0.8105(11) 0.6308(10) 0.049(3) Uani 0.411(11) 1 d PDU B 2 
F7B F 0.4977(13) 0.8377(8) 0.9585(7) 0.080(4) Uani 0.411(11) 1 d PDU B 2 
F8B F 0.6567(8) 0.8734(10) 0.9554(7) 0.086(4) Uani 0.411(11) 1 d PDU B 2 
F9B F 0.5263(12) 0.9413(6) 0.9088(7) 0.065(3) Uani 0.411(11) 1 d PDU B 2 
F10B F 0.5389(12) 0.8937(5) 0.6377(10) 0.060(4) Uani 0.411(11) 1 d PDU B 2 
F11B F 0.4098(7) 0.7947(9) 0.5806(8) 0.054(3) Uani 0.411(11) 1 d PDU B 2 
F12B F 0.5769(10) 0.7719(9) 0.5903(9) 0.047(4) Uani 0.411(11) 1 d PDU B 2 
F13 F 0.0286(9) 0.5892(9) 0.8341(9) 0.100(4) Uani 0.536(18) 1 d PDU B 1 
F14 F 0.1853(9) 0.6312(8) 0.9109(4) 0.067(3) Uani 0.536(18) 1 d PDU B 1 
F15 F 0.1153(12) 0.7015(6) 0.8281(7) 0.076(3) Uani 0.536(18) 1 d PDU B 1 
F13B F 0.0215(7) 0.6236(10) 0.8049(8) 0.084(4) Uani 0.464(18) 1 d PDU B 2 
F14B F 0.1406(13) 0.5966(9) 0.8997(7) 0.075(4) Uani 0.464(18) 1 d PDU B 2 
F15B F 0.1685(13) 0.7054(6) 0.8536(9) 0.078(4) Uani 0.464(18) 1 d PDU B 2 
F16 F 0.0071(8) 0.3875(9) 0.5900(6) 0.075(3) Uani 0.63(3) 1 d PDU B 1 
F17 F 0.0779(13) 0.4649(7) 0.5261(6) 0.085(4) Uani 0.63(3) 1 d PDU B 1 
F18 F 0.1512(7) 0.3597(5) 0.5584(6) 0.058(3) Uani 0.63(3) 1 d PDU B 1 
F16B F -0.0077(7) 0.4258(15) 0.5792(8) 0.064(5) Uani 0.37(3) 1 d PDU B 2 
F17B F 0.1088(13) 0.4501(12) 0.5205(7) 0.055(4) Uani 0.37(3) 1 d PDU B 2 
F18B F 0.1241(19) 0.3475(7) 0.5782(13) 0.092(6) Uani 0.37(3) 1 d PDU B 2 
F19 F 0.4218(5) 0.3274(5) 0.9091(5) 0.079(2) Uani 0.714(12) 1 d PDU B 1 
F20 F 0.5838(6) 0.2937(3) 0.9271(5) 0.074(2) Uani 0.714(12) 1 d PDU B 1 
F21 F 0.5342(8) 0.3626(5) 1.0203(3) 0.075(2) Uani 0.714(12) 1 d PDU B 1 
F19B F 0.4204(10) 0.3564(13) 0.9515(13) 0.088(6) Uani 0.286(12) 1 d PDU B 2 
F20B F 0.5149(19) 0.2898(8) 0.8880(8) 0.082(5) Uani 0.286(12) 1 d PDU B 2 
F21B F 0.5812(14) 0.3384(12) 1.0105(8) 0.072(5) Uani 0.286(12) 1 d PDU B 2 
F22 F 0.8675(9) 0.5638(7) 1.0521(7) 0.115(4) Uani 0.599(11) 1 d PDU B 1 
F23 F 0.8050(8) 0.6759(5) 1.0162(6) 0.086(3) Uani 0.599(11) 1 d PDU B 1 
F24 F 0.8832(6) 0.5955(7) 0.9480(5) 0.098(3) Uani 0.599(11) 1 d PDU B 1 
F22B F 0.8933(10) 0.5436(9) 0.9880(10) 0.115(5) Uani 0.401(11) 1 d PDU B 2 
F23B F 0.8210(11) 0.6014(9) 1.0717(5) 0.082(4) Uani 0.401(11) 1 d PDU B 2 
F24B F 0.8378(14) 0.6682(8) 0.9852(10) 0.105(5) Uani 0.401(11) 1 d PDU B 2 
 
loop_ 
 _atom_site_aniso_label 
 _atom_site_aniso_U_11 
 _atom_site_aniso_U_22 
 _atom_site_aniso_U_33 
 _atom_site_aniso_U_23 
 _atom_site_aniso_U_13 
 _atom_site_aniso_U_12 
Ru1 0.0361(3) 0.0517(3) 0.0499(3) 0.0278(3) 0.0189(2) 0.0191(2) 
Ni1 0.0341(4) 0.0406(5) 0.0390(4) 0.0183(3) 0.0141(3) 0.0128(3) 
S1 0.040(2) 0.069(3) 0.0435(17) 0.0288(16) 0.0221(15) 0.024(2) 
S2 0.0296(19) 0.0363(19) 0.067(2) 0.0251(16) 0.0170(17) 0.0026(13) 
C27 0.049(5) 0.084(7) 0.067(6) 0.043(5) 0.029(5) 0.026(5) 
C28 0.047(5) 0.075(7) 0.076(7) 0.048(6) 0.032(5) 0.016(5) 
C29 0.041(4) 0.070(6) 0.075(8) 0.043(6) 0.031(5) 0.010(4) 
S1B 0.044(5) 0.082(6) 0.068(5) 0.051(4) 0.037(4) 0.027(4) 
S2B 0.027(4) 0.058(5) 0.089(6) 0.045(4) 0.026(4) 0.002(3) 
C27B 0.047(7) 0.076(10) 0.075(8) 0.047(8) 0.038(7) 0.017(7) 
C28B 0.046(7) 0.074(8) 0.079(9) 0.045(7) 0.035(7) 0.015(6) 
C29B 0.040(6) 0.060(8) 0.076(8) 0.042(8) 0.032(7) 0.008(6) 
P1 0.0300(7) 0.0339(8) 0.0331(8) 0.0108(6) 0.0075(6) 0.0070(6) 
P2 0.0320(7) 0.0339(8) 0.0322(8) 0.0103(6) 0.0089(6) 0.0047(6) 
C1 0.029(3) 0.032(3) 0.037(3) 0.010(3) 0.007(2) 0.006(2) 
C2 0.040(3) 0.034(3) 0.043(3) 0.012(3) 0.015(3) 0.010(3) 
C3 0.044(4) 0.046(4) 0.057(4) 0.018(3) 0.022(3) 0.011(3) 
C4 0.042(4) 0.044(4) 0.068(5) 0.023(4) 0.014(3) -0.001(3) 
C5 0.046(4) 0.039(4) 0.056(4) 0.005(3) 0.002(3) -0.003(3) 
C6 0.043(3) 0.042(4) 0.042(4) 0.009(3) 0.010(3) 0.006(3) 
C7 0.029(3) 0.036(3) 0.031(3) 0.006(2) 0.005(2) 0.000(2) 
C8 0.050(4) 0.042(4) 0.047(4) 0.007(3) -0.002(3) 0.012(3) 
C9 0.066(5) 0.055(5) 0.043(4) -0.003(3) -0.009(3) 0.011(4) 
C10 0.054(4) 0.041(4) 0.051(4) -0.004(3) 0.005(3) 0.003(3) 
C11 0.047(4) 0.035(4) 0.059(4) 0.011(3) 0.011(3) 0.009(3) 
C12 0.036(3) 0.040(4) 0.043(4) 0.006(3) 0.002(3) 0.006(3) 
C13 0.034(3) 0.039(3) 0.036(3) 0.013(3) 0.006(3) 0.007(3) 
C14 0.036(3) 0.041(3) 0.031(3) 0.013(3) 0.008(2) 0.001(3) 
C15 0.038(3) 0.042(3) 0.031(3) 0.012(3) 0.009(3) 0.008(3) 
C16 0.041(3) 0.048(4) 0.043(4) 0.003(3) 0.009(3) 0.007(3) 
C17 0.061(4) 0.051(4) 0.050(4) -0.001(3) 0.012(3) 0.015(3) 
C18 0.063(5) 0.068(5) 0.046(4) 0.009(4) 0.020(4) 0.029(4) 
C19 0.045(4) 0.070(5) 0.048(4) 0.020(4) 0.018(3) 0.020(3) 
C20 0.039(3) 0.048(4) 0.037(3) 0.012(3) 0.010(3) 0.008(3) 
C21 0.031(3) 0.040(3) 0.051(4) 0.013(3) 0.010(3) 0.005(3) 
C22 0.052(4) 0.054(4) 0.054(4) 0.001(3) 0.011(3) -0.004(3) 
C23 0.065(5) 0.058(5) 0.083(6) -0.018(5) 0.006(4) -0.012(4) 
C24 0.057(5) 0.043(5) 0.126(8) 0.025(5) 0.016(5) -0.009(4) 
C25 0.061(5) 0.058(5) 0.098(7) 0.037(5) 0.009(5) -0.007(4) 
C26 0.051(4) 0.048(4) 0.065(5) 0.022(4) 0.012(3) -0.002(3) 
C30 0.035(3) 0.054(4) 0.056(4) 0.018(3) 0.015(3) 0.021(3) 
C31 0.037(4) 0.063(4) 0.052(4) 0.027(3) 0.018(3) 0.019(3) 
C32 0.035(3) 0.057(4) 0.062(4) 0.026(3) 0.019(3) 0.011(3) 
C33 0.042(4) 0.058(4) 0.060(4) 0.017(3) 0.013(3) 0.015(3) 
C34 0.044(4) 0.062(4) 0.050(4) 0.025(3) 0.014(3) 0.021(3) 
C35 0.040(4) 0.050(4) 0.060(4) 0.030(3) 0.019(3) 0.023(3) 
C36 0.052(6) 0.057(5) 0.066(5) 0.015(4) 0.015(4) 0.025(4) 
C37 0.086(7) 0.089(7) 0.099(7) -0.016(6) 0.032(6) 0.026(6) 
C38 0.091(7) 0.061(6) 0.091(7) 0.016(5) 0.017(6) 0.001(5) 
C39 0.063(6) 0.074(6) 0.079(6) 0.001(5) 0.017(5) 0.006(5) 
C30B 0.042(6) 0.060(6) 0.059(6) 0.018(5) 0.014(6) 0.016(6) 
C31B 0.042(6) 0.059(6) 0.056(6) 0.023(5) 0.016(6) 0.020(6) 
C32B 0.041(6) 0.055(6) 0.058(6) 0.024(6) 0.016(6) 0.022(6) 
C33B 0.039(6) 0.056(5) 0.058(5) 0.022(5) 0.016(5) 0.020(5) 
C34B 0.037(6) 0.059(6) 0.056(6) 0.024(6) 0.017(6) 0.019(6) 
C35B 0.038(6) 0.058(6) 0.060(6) 0.024(6) 0.016(6) 0.014(6) 
C36B 0.048(9) 0.064(8) 0.068(8) 0.010(8) 0.012(8) 0.013(8) 
C37B 0.060(12) 0.065(12) 0.074(12) 0.010(10) 0.015(10) 0.010(10) 
C38B 0.068(12) 0.072(12) 0.071(12) 0.007(10) 0.016(10) 0.005(10) 
C39B 0.063(10) 0.065(10) 0.072(10) 0.011(9) 0.017(9) 0.015(9) 
B1 0.034(3) 0.031(3) 0.034(3) 0.010(3) 0.009(3) 0.000(3) 
C56 0.035(3) 0.033(3) 0.032(3) 0.007(2) 0.008(2) 0.002(2) 
C57 0.037(3) 0.040(3) 0.042(3) 0.005(3) 0.007(3) 0.007(3) 
C58 0.044(4) 0.046(4) 0.050(4) 0.010(3) 0.015(3) 0.013(3) 
C59 0.030(3) 0.050(4) 0.061(4) 0.020(3) 0.009(3) 0.005(3) 
C60 0.035(3) 0.032(3) 0.048(4) 0.012(3) 0.003(3) -0.001(3) 
C61 0.038(3) 0.031(3) 0.037(3) 0.007(3) 0.007(3) 0.002(2) 
C62 0.044(4) 0.065(5) 0.079(6) 0.014(4) 0.022(4) 0.009(4) 
C63 0.041(4) 0.048(4) 0.069(5) 0.019(4) -0.013(3) -0.005(3) 
C64 0.038(3) 0.029(3) 0.031(3) 0.008(2) 0.011(2) 0.003(2) 
C65 0.041(3) 0.029(3) 0.035(3) 0.004(2) 0.013(3) 0.000(2) 
C66 0.054(4) 0.031(3) 0.036(3) 0.004(3) 0.012(3) -0.002(3) 
C67 0.069(5) 0.047(4) 0.043(4) 0.021(3) -0.002(3) 0.003(3) 
C68 0.049(4) 0.046(4) 0.051(4) 0.018(3) -0.005(3) -0.006(3) 
C69 0.043(3) 0.035(3) 0.042(3) 0.012(3) 0.002(3) -0.007(3) 
C70 0.086(5) 0.037(4) 0.039(4) 0.008(3) 0.023(4) 0.004(4) 
C71 0.096(7) 0.074(6) 0.077(6) 0.043(5) -0.025(5) -0.012(5) 
C40 0.021(5) 0.031(4) 0.031(5) 0.016(4) 0.002(4) 0.014(3) 
C41 0.039(6) 0.036(4) 0.027(5) 0.015(4) 0.006(5) 0.010(4) 
C42 0.046(5) 0.035(4) 0.033(4) 0.011(4) 0.008(4) 0.010(4) 
C43 0.047(5) 0.043(4) 0.039(5) 0.007(4) 0.013(4) 0.014(4) 
C44 0.042(4) 0.044(4) 0.040(4) 0.011(4) 0.017(4) 0.009(4) 
C45 0.034(5) 0.039(4) 0.039(5) 0.010(4) 0.007(5) 0.005(4) 
C46 0.069(5) 0.040(4) 0.048(5) 0.008(4) 0.023(5) 0.011(4) 
C47 0.058(5) 0.059(5) 0.060(5) 0.009(5) 0.030(4) 0.010(5) 
F1 0.086(5) 0.047(4) 0.061(4) 0.015(3) 0.030(4) -0.004(4) 
F2 0.057(5) 0.041(4) 0.070(6) 0.007(4) 0.011(4) 0.021(3) 
F3 0.054(4) 0.045(4) 0.059(4) 0.009(4) 0.031(3) -0.003(3) 
F4 0.066(4) 0.103(5) 0.088(5) 0.011(4) 0.033(4) -0.023(4) 
F5 0.074(5) 0.088(5) 0.079(5) 0.039(4) 0.038(4) 0.006(4) 
F6 0.092(5) 0.086(5) 0.100(5) -0.001(4) 0.067(4) 0.010(4) 
C40B 0.037(6) 0.039(5) 0.025(5) 0.008(5) 0.001(5) -0.002(5) 
C41B 0.028(6) 0.036(5) 0.032(6) 0.010(5) 0.007(5) 0.010(4) 
C42B 0.044(5) 0.036(4) 0.036(5) 0.009(4) 0.010(5) 0.011(4) 
C43B 0.046(5) 0.042(5) 0.039(5) 0.007(5) 0.014(5) 0.014(5) 
C44B 0.043(5) 0.044(4) 0.042(5) 0.011(4) 0.017(4) 0.010(4) 
C45B 0.032(6) 0.036(5) 0.037(5) 0.014(4) 0.007(5) 0.009(5) 
C46B 0.066(6) 0.040(5) 0.048(6) 0.009(5) 0.022(5) 0.011(5) 
C47B 0.057(6) 0.060(6) 0.060(6) 0.011(5) 0.030(5) 0.009(5) 
F1B 0.085(6) 0.051(5) 0.058(5) 0.021(4) 0.020(4) -0.004(5) 
F2B 0.054(5) 0.037(5) 0.041(5) 0.010(4) 0.010(4) 0.017(4) 
F3B 0.065(5) 0.062(5) 0.084(6) 0.009(5) 0.047(5) -0.003(4) 
F4B 0.063(5) 0.102(6) 0.096(6) 0.033(5) 0.037(4) 0.009(4) 
F5B 0.085(6) 0.068(5) 0.087(6) 0.014(4) 0.046(5) -0.004(4) 
F6B 0.077(6) 0.094(6) 0.059(5) 0.022(4) 0.032(4) -0.004(5) 
C48 0.029(4) 0.032(4) 0.033(4) 0.010(3) 0.008(4) 0.002(4) 
C49 0.030(4) 0.039(4) 0.032(4) 0.011(4) 0.010(4) 0.011(4) 
C50 0.041(4) 0.040(4) 0.040(4) 0.016(3) 0.013(4) 0.009(4) 
C51 0.045(5) 0.033(4) 0.047(4) 0.016(4) 0.014(4) 0.006(4) 
C52 0.044(4) 0.033(4) 0.039(4) 0.008(3) 0.013(4) 0.006(4) 
C53 0.038(5) 0.035(4) 0.033(4) 0.013(4) 0.011(4) 0.003(4) 
C54 0.069(5) 0.040(5) 0.050(5) 0.008(4) 0.017(5) 0.005(5) 
C55 0.062(5) 0.048(5) 0.049(4) 0.020(4) 0.022(5) 0.013(5) 
F7 0.086(5) 0.098(5) 0.071(5) -0.011(4) 0.030(4) 0.020(4) 
F8 0.110(5) 0.066(4) 0.043(4) 0.002(3) 0.001(4) 0.021(4) 
F9 0.098(5) 0.048(4) 0.074(4) 0.001(3) 0.027(4) -0.013(4) 
F10 0.075(5) 0.056(4) 0.066(4) 0.038(3) 0.025(4) 0.009(3) 
F11 0.079(4) 0.070(5) 0.057(4) 0.035(4) 0.015(3) 0.032(4) 
F12 0.067(5) 0.055(5) 0.044(4) 0.014(3) 0.020(4) 0.004(4) 
C48B 0.022(5) 0.032(5) 0.031(5) 0.010(4) 0.007(5) 0.009(5) 
C49B 0.039(6) 0.039(5) 0.034(5) 0.011(4) 0.009(5) 0.008(5) 
C50B 0.041(5) 0.040(4) 0.040(4) 0.016(4) 0.014(4) 0.009(5) 
C51B 0.045(5) 0.033(5) 0.046(5) 0.015(4) 0.013(5) 0.007(5) 
C52B 0.045(5) 0.034(4) 0.040(4) 0.009(4) 0.015(5) 0.005(5) 
C53B 0.037(5) 0.035(5) 0.034(5) 0.010(4) 0.012(5) 0.002(5) 
C54B 0.069(6) 0.042(5) 0.050(5) 0.006(5) 0.016(6) 0.005(6) 
C55B 0.060(6) 0.047(6) 0.048(5) 0.020(5) 0.020(5) 0.013(5) 
F7B 0.106(6) 0.078(6) 0.062(5) 0.008(4) 0.040(5) -0.007(5) 
F8B 0.084(6) 0.091(6) 0.066(5) -0.008(5) 0.012(5) 0.005(5) 
F9B 0.082(6) 0.041(5) 0.064(5) 0.004(4) 0.011(5) 0.018(4) 
F10B 0.078(6) 0.052(5) 0.059(5) 0.031(4) 0.022(5) 0.018(4) 
F11B 0.063(5) 0.057(6) 0.049(5) 0.027(5) 0.012(4) 0.018(4) 
F12B 0.049(6) 0.056(6) 0.043(5) 0.017(4) 0.019(4) 0.007(5) 
F13 0.086(5) 0.111(6) 0.112(6) 0.005(5) 0.058(5) 0.002(4) 
F14 0.073(5) 0.075(6) 0.063(5) 0.014(4) 0.032(4) 0.032(4) 
F15 0.090(6) 0.067(5) 0.080(5) 0.019(4) 0.032(4) 0.042(4) 
F13B 0.067(5) 0.101(6) 0.084(6) 0.008(5) 0.024(4) 0.045(5) 
F14B 0.086(6) 0.085(6) 0.072(5) 0.027(4) 0.042(4) 0.026(5) 
F15B 0.088(7) 0.073(6) 0.077(6) 0.003(4) 0.039(5) 0.012(5) 
F16 0.055(4) 0.073(6) 0.081(5) -0.014(4) 0.020(4) -0.022(4) 
F17 0.092(6) 0.080(5) 0.071(5) 0.020(4) -0.004(4) 0.015(4) 
F18 0.054(4) 0.056(4) 0.056(4) -0.005(3) 0.013(3) -0.007(3) 
F16B 0.044(6) 0.077(8) 0.059(6) 0.006(5) 0.004(4) -0.009(5) 
F17B 0.043(6) 0.071(7) 0.048(6) -0.001(5) 0.017(4) 0.002(5) 
F18B 0.094(8) 0.077(7) 0.093(8) 0.022(5) 0.004(5) 0.002(6) 
F19 0.075(4) 0.067(4) 0.091(5) 0.042(4) 0.002(3) -0.027(3) 
F20 0.080(4) 0.038(3) 0.108(5) 0.017(3) 0.033(4) 0.008(3) 
F21 0.112(5) 0.068(4) 0.055(3) 0.026(3) 0.034(3) -0.004(4) 
F19B 0.093(8) 0.080(8) 0.094(8) 0.027(6) 0.029(6) -0.009(5) 
F20B 0.100(8) 0.067(7) 0.079(7) 0.014(5) 0.026(6) 0.001(6) 
F21B 0.080(7) 0.070(7) 0.073(7) 0.040(5) 0.018(5) 0.005(5) 
F22 0.094(5) 0.117(6) 0.111(6) 0.050(5) -0.027(4) -0.006(4) 
F23 0.077(5) 0.079(5) 0.084(5) 0.000(4) 0.007(4) -0.025(4) 
F24 0.060(4) 0.110(6) 0.111(6) 0.018(4) 0.012(4) -0.016(4) 
F22B 0.085(6) 0.124(7) 0.122(7) 0.009(6) 0.019(5) 0.002(5) 
F23B 0.072(6) 0.080(6) 0.072(6) 0.006(5) -0.009(5) 0.005(5) 
F24B 0.096(7) 0.108(7) 0.104(7) 0.035(6) 0.012(5) -0.018(5) 
 
_geom_special_details 
; 
 All esds (except the esd in the dihedral angle between two l.s. planes) 
 are estimated using the full covariance matrix.  The cell esds are taken 
 into account individually in the estimation of esds in distances, angles 
 and torsion angles; correlations between esds in cell parameters are only 
 used when they are defined by crystal symmetry.  An approximate (isotropic) 
 treatment of cell esds is used for estimating esds involving l.s. planes. 
; 
 
loop_ 
 _geom_bond_atom_site_label_1 
 _geom_bond_atom_site_label_2 
 _geom_bond_distance 
 _geom_bond_site_symmetry_2 
 _geom_bond_publ_flag 
Ru1 C32 2.190(6) . ? 
Ru1 C34 2.198(6) . ? 
Ru1 C31 2.205(6) . ? 
Ru1 C35B 2.205(10) . ? 
Ru1 C31B 2.206(10) . ? 
Ru1 C34B 2.207(10) . ? 
Ru1 C32B 2.208(10) . ? 
Ru1 C30B 2.209(10) . ? 
Ru1 C35 2.211(6) . ? 
Ru1 C33B 2.214(10) . ? 
Ru1 C33 2.224(7) . ? 
Ru1 C30 2.229(6) . ? 
Ni1 P2 2.2355(16) . ? 
Ni1 P1 2.2420(15) . ? 
Ni1 S1 2.245(4) . ? 
Ni1 S1B 2.251(8) . ? 
Ni1 S2 2.275(4) . ? 
Ni1 S2B 2.283(9) . ? 
S1 C27 1.840(11) . ? 
S2 C29 1.833(10) . ? 
C27 C28 1.511(16) . ? 
C27 H27A 0.9900 . ? 
C27 H27B 0.9900 . ? 
C28 C29 1.501(15) . ? 
C28 H28A 0.9900 . ? 
C28 H28B 0.9900 . ? 
C29 H29A 0.9900 . ? 
C29 H29B 0.9900 . ? 
S1B C27B 1.836(15) . ? 
S2B C29B 1.843(13) . ? 
C27B C28B 1.512(19) . ? 
C27B H27C 0.9900 . ? 
C27B H27D 0.9900 . ? 
C28B C29B 1.502(18) . ? 
C28B H28C 0.9900 . ? 
C28B H28D 0.9900 . ? 
C29B H29C 0.9900 . ? 
C29B H29D 0.9900 . ? 
P1 C7 1.814(6) . ? 
P1 C1 1.819(5) . ? 
P1 C13 1.858(6) . ? 
P2 C15 1.814(6) . ? 
P2 C21 1.816(6) . ? 
P2 C14 1.840(5) . ? 
C1 C2 1.392(8) . ? 
C1 C6 1.397(8) . ? 
C2 C3 1.387(8) . ? 
C2 H2A 0.9500 . ? 
C3 C4 1.375(9) . ? 
C3 H3A 0.9500 . ? 
C4 C5 1.375(9) . ? 
C4 H4A 0.9500 . ? 
C5 C6 1.384(8) . ? 
C5 H5A 0.9500 . ? 
C6 H6A 0.9500 . ? 
C7 C8 1.389(8) . ? 
C7 C12 1.391(8) . ? 
C8 C9 1.377(9) . ? 
C8 H8A 0.9500 . ? 
C9 C10 1.376(9) . ? 
C9 H9A 0.9500 . ? 
C10 C11 1.369(9) . ? 
C10 H10A 0.9500 . ? 
C11 C12 1.382(8) . ? 
C11 H11A 0.9500 . ? 
C12 H12A 0.9500 . ? 
C13 C14 1.531(8) . ? 
C13 H13A 0.9900 . ? 
C13 H13B 0.9900 . ? 
C14 H14A 0.9900 . ? 
C14 H14B 0.9900 . ? 
C15 C16 1.388(8) . ? 
C15 C20 1.399(8) . ? 
C16 C17 1.387(9) . ? 
C16 H16A 0.9500 . ? 
C17 C18 1.370(10) . ? 
C17 H17A 0.9500 . ? 
C18 C19 1.387(10) . ? 
C18 H18A 0.9500 . ? 
C19 C20 1.384(8) . ? 
C19 H19A 0.9500 . ? 
C20 H20A 0.9500 . ? 
C21 C22 1.382(9) . ? 
C21 C26 1.398(9) . ? 
C22 C23 1.407(10) . ? 
C22 H22A 0.9500 . ? 
C23 C24 1.365(12) . ? 
C23 H23A 0.9500 . ? 
C24 C25 1.352(12) . ? 
C24 H24A 0.9500 . ? 
C25 C26 1.387(10) . ? 
C25 H25A 0.9500 . ? 
C26 H26A 0.9500 . ? 
C30 C31 1.409(12) . ? 
C30 C35 1.420(12) . ? 
C30 C36 1.528(13) . ? 
C31 C32 1.413(12) . ? 
C31 H31A 0.9500 . ? 
C32 C33 1.415(12) . ? 
C32 H32A 0.9500 . ? 
C33 C34 1.419(12) . ? 
C33 C39 1.525(13) . ? 
C34 C35 1.403(12) . ? 
C34 H34A 0.9500 . ? 
C35 H35A 0.9500 . ? 
C36 C38 1.48(2) . ? 
C36 C37 1.536(17) . ? 
C36 H36A 1.0000 . ? 
C37 H37A 0.9800 . ? 
C37 H37B 0.9800 . ? 
C37 H37C 0.9800 . ? 
C38 H38A 0.9800 . ? 
C38 H38B 0.9800 . ? 
C38 H38C 0.9800 . ? 
C39 H39A 0.9800 . ? 
C39 H39B 0.9800 . ? 
C39 H39C 0.9800 . ? 
C30B C31B 1.409(18) . ? 
C30B C35B 1.421(17) . ? 
C30B C36B 1.531(18) . ? 
C31B C32B 1.412(18) . ? 
C31B H31B 0.9500 . ? 
C32B C33B 1.415(18) . ? 
C32B H32B 0.9500 . ? 
C33B C34B 1.420(18) . ? 
C33B C39B 1.529(18) . ? 
C34B C35B 1.403(18) . ? 
C34B H34B 0.9500 . ? 
C35B H35B 0.9500 . ? 
C36B C38B 1.48(2) . ? 
C36B C37B 1.54(2) . ? 
C36B H36B 1.0000 . ? 
C37B H37D 0.9800 . ? 
C37B H37E 0.9800 . ? 
C37B H37F 0.9800 . ? 
C38B H38D 0.9800 . ? 
C38B H38E 0.9800 . ? 
C38B H38F 0.9800 . ? 
C39B H39D 0.9800 . ? 
C39B H39E 0.9800 . ? 
C39B H39F 0.9800 . ? 
B1 C64 1.635(8) . ? 
B1 C56 1.652(8) . ? 
B1 C48 1.670(6) . ? 
B1 C48B 1.670(6) . ? 
B1 C40 1.676(6) . ? 
B1 C40B 1.679(6) . ? 
C56 C57 1.394(8) . ? 
C56 C61 1.397(8) . ? 
C57 C58 1.386(8) . ? 
C57 H57A 0.9500 . ? 
C58 C59 1.386(9) . ? 
C58 C62 1.497(9) . ? 
C59 C60 1.381(9) . ? 
C59 H59A 0.9500 . ? 
C60 C61 1.392(8) . ? 
C60 C63 1.501(8) . ? 
C61 H61A 0.9500 . ? 
C62 F14B 1.299(8) . ? 
C62 F15 1.322(8) . ? 
C62 F13B 1.333(8) . ? 
C62 F13 1.345(8) . ? 
C62 F15B 1.349(8) . ? 
C62 F14 1.357(8) . ? 
C63 F18B 1.316(9) . ? 
C63 F17 1.319(8) . ? 
C63 F17B 1.331(9) . ? 
C63 F16 1.334(7) . ? 
C63 F16B 1.342(8) . ? 
C63 F18 1.360(7) . ? 
C64 C65 1.397(7) . ? 
C64 C69 1.401(8) . ? 
C65 C66 1.384(8) . ? 
C65 H65A 0.9500 . ? 
C66 C67 1.375(9) . ? 
C66 C70 1.484(8) . ? 
C67 C68 1.380(9) . ? 
C67 H67A 0.9500 . ? 
C68 C69 1.391(8) . ? 
C68 C71 1.506(10) . ? 
C69 H69A 0.9500 . ? 
C70 F19 1.309(7) . ? 
C70 F21 1.330(6) . ? 
C70 F21B 1.330(8) . ? 
C70 F20B 1.333(8) . ? 
C70 F19B 1.349(9) . ? 
C70 F20 1.354(6) . ? 
C71 F22 1.288(7) . ? 
C71 F24B 1.295(9) . ? 
C71 F22B 1.327(8) . ? 
C71 F23 1.355(8) . ? 
C71 F24 1.365(8) . ? 
C71 F23B 1.383(8) . ? 
C40 C41 1.3900 . ? 
C40 C45 1.3900 . ? 
C41 C42 1.3900 . ? 
C41 H41A 0.9500 . ? 
C42 C43 1.3900 . ? 
C42 C46 1.491(8) . ? 
C43 C44 1.3900 . ? 
C43 H43A 0.9500 . ? 
C44 C45 1.3900 . ? 
C44 C47 1.468(8) . ? 
C45 H45A 0.9500 . ? 
C46 F2 1.324(9) . ? 
C46 F1 1.336(8) . ? 
C46 F3 1.385(9) . ? 
C47 F6 1.316(8) . ? 
C47 F4 1.351(8) . ? 
C47 F5 1.352(8) . ? 
C40B C41B 1.3900 . ? 
C40B C45B 1.3900 . ? 
C41B C42B 1.3900 . ? 
C41B H41B 0.9500 . ? 
C42B C43B 1.3900 . ? 
C42B C46B 1.487(10) . ? 
C43B C44B 1.3900 . ? 
C43B H43B 0.9500 . ? 
C44B C45B 1.3900 . ? 
C44B C47B 1.471(10) . ? 
C45B H45B 0.9500 . ? 
C46B F3B 1.29(2) . ? 
C46B F2B 1.344(19) . ? 
C46B F1B 1.39(2) . ? 
C47B F4B 1.30(2) . ? 
C47B F5B 1.33(2) . ? 
C47B F6B 1.36(2) . ? 
C48 C49 1.400(9) . ? 
C48 C53 1.402(9) . ? 
C49 C50 1.387(10) . ? 
C49 H49A 0.9500 . ? 
C50 C51 1.376(10) . ? 
C50 C55 1.497(9) . ? 
C51 C52 1.387(9) . ? 
C51 H51A 0.9500 . ? 
C52 C53 1.385(9) . ? 
C52 C54 1.479(10) . ? 
C53 H53A 0.9500 . ? 
C54 F9 1.325(8) . ? 
C54 F8 1.326(8) . ? 
C54 F7 1.365(8) . ? 
C55 F11 1.326(9) . ? 
C55 F12 1.333(9) . ? 
C55 F10 1.361(9) . ? 
C48B C49B 1.398(11) . ? 
C48B C53B 1.402(11) . ? 
C49B C50B 1.386(11) . ? 
C49B H49B 0.9500 . ? 
C50B C51B 1.376(11) . ? 
C50B C55B 1.494(11) . ? 
C51B C52B 1.387(11) . ? 
C51B H51B 0.9500 . ? 
C52B C53B 1.385(11) . ? 
C52B C54B 1.479(12) . ? 
C53B H53B 0.9500 . ? 
C54B F7B 1.28(2) . ? 
C54B F9B 1.34(2) . ? 
C54B F8B 1.35(2) . ? 
C55B F10B 1.35(2) . ? 
C55B F12B 1.35(2) . ? 
C55B F11B 1.37(2) . ? 
 
loop_ 
 _geom_angle_atom_site_label_1 
 _geom_angle_atom_site_label_2 
 _geom_angle_atom_site_label_3 
 _geom_angle 
 _geom_angle_site_symmetry_1 
 _geom_angle_site_symmetry_3 
 _geom_angle_publ_flag 
C32 Ru1 C34 67.2(3) . . ? 
C32 Ru1 C31 37.5(3) . . ? 
C34 Ru1 C31 79.0(3) . . ? 
C32 Ru1 C35B 4(2) . . ? 
C34 Ru1 C35B 63(2) . . ? 
C31 Ru1 C35B 37.7(16) . . ? 
C32 Ru1 C31B 71(2) . . ? 
C34 Ru1 C31B 4(2) . . ? 
C31 Ru1 C31B 82(2) . . ? 
C35B Ru1 C31B 67.0(7) . . ? 
C32 Ru1 C34B 37.3(16) . . ? 
C34 Ru1 C34B 76(2) . . ? 
C31 Ru1 C34B 3(2) . . ? 
C35B Ru1 C34B 37.1(5) . . ? 
C31B Ru1 C34B 78.9(7) . . ? 
C32 Ru1 C32B 83(2) . . ? 
C34 Ru1 C32B 38.9(15) . . ? 
C31 Ru1 C32B 70(2) . . ? 
C35B Ru1 C32B 79.4(7) . . ? 
C31B Ru1 C32B 37.3(5) . . ? 
C34B Ru1 C32B 66.8(7) . . ? 
C32 Ru1 C30B 40.9(19) . . ? 
C34 Ru1 C30B 33.4(15) . . ? 
C31 Ru1 C30B 69.4(19) . . ? 
C35B Ru1 C30B 37.6(5) . . ? 
C31B Ru1 C30B 37.2(5) . . ? 
C34B Ru1 C30B 67.4(7) . . ? 
C32B Ru1 C30B 67.5(7) . . ? 
C32 Ru1 C35 79.6(3) . . ? 
C34 Ru1 C35 37.1(3) . . ? 
C31 Ru1 C35 66.9(3) . . ? 
C35B Ru1 C35 76(2) . . ? 
C31B Ru1 C35 35.9(16) . . ? 
C34B Ru1 C35 64(2) . . ? 
C32B Ru1 C35 4(2) . . ? 
C30B Ru1 C35 64.5(14) . . ? 
C32 Ru1 C33B 69.9(17) . . ? 
C34 Ru1 C33B 67(2) . . ? 
C31 Ru1 C33B 40(2) . . ? 
C35B Ru1 C33B 67.7(7) . . ? 
C31B Ru1 C33B 67.6(7) . . ? 
C34B Ru1 C33B 37.5(5) . . ? 
C32B Ru1 C33B 37.3(5) . . ? 
C30B Ru1 C33B 80.6(7) . . ? 
C35 Ru1 C33B 36(2) . . ? 
C32 Ru1 C33 37.4(3) . . ? 
C34 Ru1 C33 37.4(3) . . ? 
C31 Ru1 C33 67.4(4) . . ? 
C35B Ru1 C33 34.2(18) . . ? 
C31B Ru1 C33 41.3(16) . . ? 
C34B Ru1 C33 65.6(19) . . ? 
C32B Ru1 C33 70.6(15) . . ? 
C30B Ru1 C33 4.2(17) . . ? 
C35 Ru1 C33 67.5(4) . . ? 
C33B Ru1 C33 81.4(17) . . ? 
C32 Ru1 C30 67.5(4) . . ? 
C34 Ru1 C30 67.1(4) . . ? 
C31 Ru1 C30 37.1(3) . . ? 
C35B Ru1 C30 65.4(17) . . ? 
C31B Ru1 C30 68(2) . . ? 
C34B Ru1 C30 34.9(19) . . ? 
C32B Ru1 C30 39(2) . . ? 
C30B Ru1 C30 79.2(16) . . ? 
C35 Ru1 C30 37.3(3) . . ? 
C33B Ru1 C30 2.6(19) . . ? 
C33 Ru1 C30 79.9(3) . . ? 
P2 Ni1 P1 87.13(6) . . ? 
P2 Ni1 S1 150.5(2) . . ? 
P1 Ni1 S1 111.21(12) . . ? 
P2 Ni1 S1B 160.9(3) . . ? 
P1 Ni1 S1B 109.3(2) . . ? 
S1 Ni1 S1B 13.0(3) . . ? 
P2 Ni1 S2 101.1(2) . . ? 
P1 Ni1 S2 115.99(14) . . ? 
S1 Ni1 S2 91.56(19) . . ? 
S1B Ni1 S2 80.9(4) . . ? 
P2 Ni1 S2B 92.7(4) . . ? 
P1 Ni1 S2B 118.0(3) . . ? 
S1 Ni1 S2B 98.1(3) . . ? 
S1B Ni1 S2B 88.1(4) . . ? 
S2 Ni1 S2B 8.6(5) . . ? 
P2 Ni1 Ru1 107.20(5) . . ? 
P1 Ni1 Ru1 164.88(5) . . ? 
S1 Ni1 Ru1 57.98(11) . . ? 
S1B Ni1 Ru1 57.6(2) . . ? 
S2 Ni1 Ru1 57.51(12) . . ? 
S2B Ni1 Ru1 57.9(3) . . ? 
C27 S1 Ni1 103.7(4) . . ? 
C27 S1 Ru1 111.0(4) . . ? 
Ni1 S1 Ru1 67.20(10) . . ? 
C29 S2 Ni1 104.3(5) . . ? 
C29 S2 Ru1 111.1(5) . . ? 
Ni1 S2 Ru1 66.81(10) . . ? 
C28 C27 S1 115.8(7) . . ? 
C28 C27 H27A 108.3 . . ? 
S1 C27 H27A 108.3 . . ? 
C28 C27 H27B 108.3 . . ? 
S1 C27 H27B 108.3 . . ? 
H27A C27 H27B 107.4 . . ? 
C29 C28 C27 115.4(9) . . ? 
C29 C28 H28A 108.4 . . ? 
C27 C28 H28A 108.4 . . ? 
C29 C28 H28B 108.4 . . ? 
C27 C28 H28B 108.4 . . ? 
H28A C28 H28B 107.5 . . ? 
C28 C29 S2 115.9(7) . . ? 
C28 C29 H29A 108.3 . . ? 
S2 C29 H29A 108.3 . . ? 
C28 C29 H29B 108.3 . . ? 
S2 C29 H29B 108.3 . . ? 
H29A C29 H29B 107.4 . . ? 
C27B S1B Ni1 108.8(10) . . ? 
C27B S1B Ru1 114.0(9) . . ? 
Ni1 S1B Ru1 67.3(2) . . ? 
C29B S2B Ni1 106.4(11) . . ? 
C29B S2B Ru1 114.5(9) . . ? 
Ni1 S2B Ru1 66.4(2) . . ? 
C28B C27B S1B 115.7(13) . . ? 
C28B C27B H27C 108.3 . . ? 
S1B C27B H27C 108.3 . . ? 
C28B C27B H27D 108.3 . . ? 
S1B C27B H27D 108.3 . . ? 
H27C C27B H27D 107.4 . . ? 
C29B C28B C27B 116.1(15) . . ? 
C29B C28B H28C 108.3 . . ? 
C27B C28B H28C 108.3 . . ? 
C29B C28B H28D 108.3 . . ? 
C27B C28B H28D 108.3 . . ? 
H28C C28B H28D 107.4 . . ? 
C28B C29B S2B 114.7(13) . . ? 
C28B C29B H29C 108.6 . . ? 
S2B C29B H29C 108.6 . . ? 
C28B C29B H29D 108.6 . . ? 
S2B C29B H29D 108.6 . . ? 
H29C C29B H29D 107.6 . . ? 
C7 P1 C1 104.2(3) . . ? 
C7 P1 C13 105.2(3) . . ? 
C1 P1 C13 105.3(3) . . ? 
C7 P1 Ni1 118.06(18) . . ? 
C1 P1 Ni1 115.70(18) . . ? 
C13 P1 Ni1 107.26(18) . . ? 
C15 P2 C21 106.5(3) . . ? 
C15 P2 C14 104.4(3) . . ? 
C21 P2 C14 102.0(3) . . ? 
C15 P2 Ni1 124.14(19) . . ? 
C21 P2 Ni1 113.8(2) . . ? 
C14 P2 Ni1 103.22(18) . . ? 
C2 C1 C6 118.8(5) . . ? 
C2 C1 P1 120.7(4) . . ? 
C6 C1 P1 120.1(4) . . ? 
C3 C2 C1 120.9(6) . . ? 
C3 C2 H2A 119.6 . . ? 
C1 C2 H2A 119.6 . . ? 
C4 C3 C2 119.2(6) . . ? 
C4 C3 H3A 120.4 . . ? 
C2 C3 H3A 120.4 . . ? 
C3 C4 C5 120.9(6) . . ? 
C3 C4 H4A 119.6 . . ? 
C5 C4 H4A 119.6 . . ? 
C4 C5 C6 120.2(6) . . ? 
C4 C5 H5A 119.9 . . ? 
C6 C5 H5A 119.9 . . ? 
C5 C6 C1 120.0(6) . . ? 
C5 C6 H6A 120.0 . . ? 
C1 C6 H6A 120.0 . . ? 
C8 C7 C12 118.2(5) . . ? 
C8 C7 P1 120.1(4) . . ? 
C12 C7 P1 121.6(4) . . ? 
C9 C8 C7 120.9(6) . . ? 
C9 C8 H8A 119.6 . . ? 
C7 C8 H8A 119.6 . . ? 
C10 C9 C8 120.2(6) . . ? 
C10 C9 H9A 119.9 . . ? 
C8 C9 H9A 119.9 . . ? 
C11 C10 C9 119.7(6) . . ? 
C11 C10 H10A 120.1 . . ? 
C9 C10 H10A 120.1 . . ? 
C10 C11 C12 120.6(6) . . ? 
C10 C11 H11A 119.7 . . ? 
C12 C11 H11A 119.7 . . ? 
C11 C12 C7 120.4(6) . . ? 
C11 C12 H12A 119.8 . . ? 
C7 C12 H12A 119.8 . . ? 
C14 C13 P1 110.8(4) . . ? 
C14 C13 H13A 109.5 . . ? 
P1 C13 H13A 109.5 . . ? 
C14 C13 H13B 109.5 . . ? 
P1 C13 H13B 109.5 . . ? 
H13A C13 H13B 108.1 . . ? 
C13 C14 P2 108.5(4) . . ? 
C13 C14 H14A 110.0 . . ? 
P2 C14 H14A 110.0 . . ? 
C13 C14 H14B 110.0 . . ? 
P2 C14 H14B 110.0 . . ? 
H14A C14 H14B 108.4 . . ? 
C16 C15 C20 117.8(5) . . ? 
C16 C15 P2 120.1(4) . . ? 
C20 C15 P2 122.0(5) . . ? 
C17 C16 C15 121.3(6) . . ? 
C17 C16 H16A 119.4 . . ? 
C15 C16 H16A 119.4 . . ? 
C18 C17 C16 120.2(7) . . ? 
C18 C17 H17A 119.9 . . ? 
C16 C17 H17A 119.9 . . ? 
C17 C18 C19 119.8(6) . . ? 
C17 C18 H18A 120.1 . . ? 
C19 C18 H18A 120.1 . . ? 
C20 C19 C18 120.1(6) . . ? 
C20 C19 H19A 120.0 . . ? 
C18 C19 H19A 120.0 . . ? 
C19 C20 C15 120.8(6) . . ? 
C19 C20 H20A 119.6 . . ? 
C15 C20 H20A 119.6 . . ? 
C22 C21 C26 119.0(6) . . ? 
C22 C21 P2 119.5(5) . . ? 
C26 C21 P2 121.4(5) . . ? 
C21 C22 C23 119.6(7) . . ? 
C21 C22 H22A 120.2 . . ? 
C23 C22 H22A 120.2 . . ? 
C24 C23 C22 119.6(8) . . ? 
C24 C23 H23A 120.2 . . ? 
C22 C23 H23A 120.2 . . ? 
C25 C24 C23 121.7(7) . . ? 
C25 C24 H24A 119.1 . . ? 
C23 C24 H24A 119.1 . . ? 
C24 C25 C26 119.6(8) . . ? 
C24 C25 H25A 120.2 . . ? 
C26 C25 H25A 120.2 . . ? 
C25 C26 C21 120.5(7) . . ? 
C25 C26 H26A 119.7 . . ? 
C21 C26 H26A 119.7 . . ? 
C31 C30 C35 118.8(8) . . ? 
C31 C30 C36 118.2(9) . . ? 
C35 C30 C36 122.8(9) . . ? 
C31 C30 Ru1 70.5(4) . . ? 
C35 C30 Ru1 70.7(4) . . ? 
C36 C30 Ru1 126.5(9) . . ? 
C30 C31 C32 120.9(8) . . ? 
C30 C31 Ru1 72.4(4) . . ? 
C32 C31 Ru1 70.7(4) . . ? 
C30 C31 H31A 119.6 . . ? 
C32 C31 H31A 119.6 . . ? 
Ru1 C31 H31A 129.9 . . ? 
C31 C32 C33 120.7(8) . . ? 
C31 C32 Ru1 71.8(4) . . ? 
C33 C32 Ru1 72.6(4) . . ? 
C31 C32 H32A 119.6 . . ? 
C33 C32 H32A 119.6 . . ? 
Ru1 C32 H32A 128.2 . . ? 
C32 C33 C34 117.9(8) . . ? 
C32 C33 C39 122.0(9) . . ? 
C34 C33 C39 120.1(9) . . ? 
C32 C33 Ru1 70.0(4) . . ? 
C34 C33 Ru1 70.3(4) . . ? 
C39 C33 Ru1 131.3(8) . . ? 
C35 C34 C33 121.7(8) . . ? 
C35 C34 Ru1 71.9(4) . . ? 
C33 C34 Ru1 72.3(4) . . ? 
C35 C34 H34A 119.2 . . ? 
C33 C34 H34A 119.2 . . ? 
Ru1 C34 H34A 129.1 . . ? 
C34 C35 C30 120.0(8) . . ? 
C34 C35 Ru1 71.0(4) . . ? 
C30 C35 Ru1 72.0(4) . . ? 
C34 C35 H35A 120.0 . . ? 
C30 C35 H35A 120.0 . . ? 
Ru1 C35 H35A 129.4 . . ? 
C38 C36 C30 114.2(10) . . ? 
C38 C36 C37 110.8(10) . . ? 
C30 C36 C37 106.0(9) . . ? 
C38 C36 H36A 108.6 . . ? 
C30 C36 H36A 108.6 . . ? 
C37 C36 H36A 108.6 . . ? 
C31B C30B C35B 118.7(15) . . ? 
C31B C30B C36B 119(2) . . ? 
C35B C30B C36B 121.8(19) . . ? 
C31B C30B Ru1 71.3(6) . . ? 
C35B C30B Ru1 71.1(6) . . ? 
C36B C30B Ru1 121(2) . . ? 
C30B C31B C32B 121.0(15) . . ? 
C30B C31B Ru1 71.5(6) . . ? 
C32B C31B Ru1 71.4(6) . . ? 
C30B C31B H31B 119.5 . . ? 
C32B C31B H31B 119.5 . . ? 
Ru1 C31B H31B 130.2 . . ? 
C31B C32B C33B 120.7(16) . . ? 
C31B C32B Ru1 71.3(6) . . ? 
C33B C32B Ru1 71.5(6) . . ? 
C31B C32B H32B 119.7 . . ? 
C33B C32B H32B 119.7 . . ? 
Ru1 C32B H32B 130.1 . . ? 
C32B C33B C34B 118.0(16) . . ? 
C32B C33B C39B 121(2) . . ? 
C34B C33B C39B 119(2) . . ? 
C32B C33B Ru1 71.1(6) . . ? 
C34B C33B Ru1 71.0(6) . . ? 
C39B C33B Ru1 140(4) . . ? 
C35B C34B C33B 121.4(16) . . ? 
C35B C34B Ru1 71.4(6) . . ? 
C33B C34B Ru1 71.5(6) . . ? 
C35B C34B H34B 119.3 . . ? 
C33B C34B H34B 119.3 . . ? 
Ru1 C34B H34B 130.6 . . ? 
C34B C35B C30B 120.2(15) . . ? 
C34B C35B Ru1 71.5(6) . . ? 
C30B C35B Ru1 71.3(6) . . ? 
C34B C35B H35B 121.0 . . ? 
C30B C35B H35B 119.9 . . ? 
Ru1 C35B H35B 129.7 . . ? 
C38B C36B C30B 114(2) . . ? 
C38B C36B C37B 109(2) . . ? 
C30B C36B C37B 103.5(18) . . ? 
C38B C36B H36B 109.9 . . ? 
C30B C36B H36B 109.9 . . ? 
C37B C36B H36B 109.9 . . ? 
C36B C37B H37D 109.5 . . ? 
C36B C37B H37E 109.5 . . ? 
H37D C37B H37E 109.5 . . ? 
C36B C37B H37F 109.5 . . ? 
H37D C37B H37F 109.5 . . ? 
H37E C37B H37F 109.5 . . ? 
C36B C38B H38D 109.5 . . ? 
C36B C38B H38E 109.5 . . ? 
H38D C38B H38E 109.5 . . ? 
C36B C38B H38F 109.5 . . ? 
H38D C38B H38F 109.5 . . ? 
H38E C38B H38F 109.5 . . ? 
C33B C39B H39D 109.5 . . ? 
C33B C39B H39E 109.5 . . ? 
H39D C39B H39E 109.5 . . ? 
C33B C39B H39F 109.5 . . ? 
H39D C39B H39F 109.5 . . ? 
H39E C39B H39F 109.5 . . ? 
C64 B1 C56 111.5(4) . . ? 
C64 B1 C48 112.2(6) . . ? 
C56 B1 C48 101.1(4) . . ? 
C64 B1 C48B 108.8(8) . . ? 
C56 B1 C48B 106.5(5) . . ? 
C64 B1 C40 106.6(8) . . ? 
C56 B1 C40 109.5(7) . . ? 
C48 B1 C40 115.9(9) . . ? 
C48B B1 C40 114.1(10) . . ? 
C64 B1 C40B 99.6(11) . . ? 
C56 B1 C40B 114.9(10) . . ? 
C48 B1 C40B 118.0(10) . . ? 
C48B B1 C40B 115.4(11) . . ? 
C57 C56 C61 115.3(5) . . ? 
C57 C56 B1 121.8(5) . . ? 
C61 C56 B1 122.8(5) . . ? 
C58 C57 C56 122.9(6) . . ? 
C58 C57 H57A 118.6 . . ? 
C56 C57 H57A 118.6 . . ? 
C59 C58 C57 120.6(6) . . ? 
C59 C58 C62 119.3(6) . . ? 
C57 C58 C62 120.1(6) . . ? 
C60 C59 C58 117.9(6) . . ? 
C60 C59 H59A 121.1 . . ? 
C58 C59 H59A 121.1 . . ? 
C59 C60 C61 121.0(6) . . ? 
C59 C60 C63 121.2(5) . . ? 
C61 C60 C63 117.8(5) . . ? 
C60 C61 C56 122.3(6) . . ? 
C60 C61 H61A 118.9 . . ? 
C56 C61 H61A 118.9 . . ? 
F14B C62 F15 125.7(9) . . ? 
F14B C62 F13B 107.9(8) . . ? 
F15 C62 F13B 74.3(7) . . ? 
F14B C62 F13 74.1(8) . . ? 
F15 C62 F13 104.9(8) . . ? 
F14B C62 F15B 108.6(9) . . ? 
F13B C62 F15B 104.1(8) . . ? 
F13 C62 F15B 128.7(9) . . ? 
F15 C62 F14 104.6(7) . . ? 
F13B C62 F14 129.9(8) . . ? 
F13 C62 F14 102.9(8) . . ? 
F15B C62 F14 79.6(7) . . ? 
F14B C62 C58 114.3(7) . . ? 
F15 C62 C58 114.4(7) . . ? 
F13B C62 C58 111.5(7) . . ? 
F13 C62 C58 115.0(7) . . ? 
F15B C62 C58 109.9(7) . . ? 
F14 C62 C58 113.8(6) . . ? 
F18B C63 F17 124.5(11) . . ? 
F18B C63 F17B 107.3(11) . . ? 
F18B C63 F16 80.2(9) . . ? 
F17 C63 F16 110.5(7) . . ? 
F17B C63 F16 123.9(9) . . ? 
F18B C63 F16B 109.1(9) . . ? 
F17 C63 F16B 85.3(8) . . ? 
F17B C63 F16B 104.0(8) . . ? 
F17 C63 F18 103.6(8) . . ? 
F17B C63 F18 83.7(9) . . ? 
F16 C63 F18 103.1(6) . . ? 
F16B C63 F18 127.8(10) . . ? 
F18B C63 C60 112.0(9) . . ? 
F17 C63 C60 112.5(7) . . ? 
F17B C63 C60 114.6(9) . . ? 
F16 C63 C60 112.7(6) . . ? 
F16B C63 C60 109.3(9) . . ? 
F18 C63 C60 113.8(5) . . ? 
C65 C64 C69 115.4(5) . . ? 
C65 C64 B1 121.8(5) . . ? 
C69 C64 B1 122.3(5) . . ? 
C66 C65 C64 122.5(5) . . ? 
C66 C65 H65A 118.7 . . ? 
C64 C65 H65A 118.7 . . ? 
C67 C66 C65 120.5(5) . . ? 
C67 C66 C70 119.0(5) . . ? 
C65 C66 C70 120.3(5) . . ? 
C66 C67 C68 118.8(6) . . ? 
C66 C67 H67A 120.6 . . ? 
C68 C67 H67A 120.6 . . ? 
C67 C68 C69 120.3(6) . . ? 
C67 C68 C71 120.5(6) . . ? 
C69 C68 C71 119.1(6) . . ? 
C68 C69 C64 122.2(5) . . ? 
C68 C69 H69A 118.9 . . ? 
C64 C69 H69A 118.9 . . ? 
F19 C70 F21 106.8(6) . . ? 
F19 C70 F21B 125.6(9) . . ? 
F19 C70 F20B 67.6(9) . . ? 
F21 C70 F20B 131.3(9) . . ? 
F21B C70 F20B 108.0(10) . . ? 
F21 C70 F19B 75.7(9) . . ? 
F21B C70 F19B 104.9(10) . . ? 
F20B C70 F19B 102.3(10) . . ? 
F19 C70 F20 106.0(6) . . ? 
F21 C70 F20 103.8(6) . . ? 
F21B C70 F20 71.6(9) . . ? 
F19B C70 F20 132.5(10) . . ? 
F19 C70 C66 115.3(5) . . ? 
F21 C70 C66 113.0(5) . . ? 
F21B C70 C66 115.7(9) . . ? 
F20B C70 C66 112.4(9) . . ? 
F19B C70 C66 112.4(10) . . ? 
F20 C70 C66 111.1(5) . . ? 
F22 C71 F24B 123.1(10) . . ? 
F22 C71 F22B 58.9(8) . . ? 
F24B C71 F22B 113.1(11) . . ? 
F22 C71 F23 110.8(8) . . ? 
F22B C71 F23 138.5(10) . . ? 
F22 C71 F24 106.2(9) . . ? 
F24B C71 F24 67.1(9) . . ? 
F22B C71 F24 53.5(8) . . ? 
F23 C71 F24 101.2(7) . . ? 
F24B C71 F23B 105.6(9) . . ? 
F22B C71 F23B 100.6(9) . . ? 
F23 C71 F23B 77.5(8) . . ? 
F24 C71 F23B 139.1(9) . . ? 
F22 C71 C68 116.6(7) . . ? 
F24B C71 C68 118.3(9) . . ? 
F22B C71 C68 109.7(9) . . ? 
F23 C71 C68 110.2(7) . . ? 
F24 C71 C68 110.7(7) . . ? 
F23B C71 C68 107.9(8) . . ? 
C41 C40 C45 120.0 . . ? 
C41 C40 B1 115.6(8) . . ? 
C45 C40 B1 124.0(8) . . ? 
C42 C41 C40 120.0 . . ? 
C42 C41 H41A 120.0 . . ? 
C40 C41 H41A 120.0 . . ? 
C43 C42 C41 120.0 . . ? 
C43 C42 C46 121.5(6) . . ? 
C41 C42 C46 118.5(6) . . ? 
C44 C43 C42 120.0 . . ? 
C44 C43 H43A 120.0 . . ? 
C42 C43 H43A 120.0 . . ? 
C43 C44 C45 120.0 . . ? 
C43 C44 C47 120.5(6) . . ? 
C45 C44 C47 119.5(6) . . ? 
C44 C45 C40 120.0 . . ? 
C44 C45 H45A 120.0 . . ? 
C40 C45 H45A 120.0 . . ? 
F2 C46 F1 109.7(9) . . ? 
F2 C46 F3 105.0(8) . . ? 
F1 C46 F3 100.9(7) . . ? 
F2 C46 C42 116.1(10) . . ? 
F1 C46 C42 116.3(10) . . ? 
F3 C46 C42 107.1(16) . . ? 
F6 C47 F4 106.4(8) . . ? 
F6 C47 F5 106.4(8) . . ? 
F4 C47 F5 101.9(8) . . ? 
F6 C47 C44 116.4(7) . . ? 
F4 C47 C44 113(2) . . ? 
F5 C47 C44 112(2) . . ? 
C41B C40B C45B 120.0 . . ? 
C41B C40B B1 116.1(10) . . ? 
C45B C40B B1 123.6(10) . . ? 
C42B C41B C40B 120.0 . . ? 
C42B C41B H41B 120.0 . . ? 
C40B C41B H41B 120.0 . . ? 
C41B C42B C43B 120.0 . . ? 
C41B C42B C46B 118.2(8) . . ? 
C43B C42B C46B 121.6(8) . . ? 
C44B C43B C42B 120.0 . . ? 
C44B C43B H43B 120.0 . . ? 
C42B C43B H43B 120.0 . . ? 
C43B C44B C45B 120.0 . . ? 
C43B C44B C47B 119.8(9) . . ? 
C45B C44B C47B 120.1(9) . . ? 
C44B C45B C40B 120.0 . . ? 
C44B C45B H45B 120.0 . . ? 
C40B C45B H45B 120.0 . . ? 
F3B C46B F2B 107.7(16) . . ? 
F3B C46B F1B 110.0(14) . . ? 
F2B C46B F1B 102.3(14) . . ? 
F3B C46B C42B 120(2) . . ? 
F2B C46B C42B 113.0(14) . . ? 
F1B C46B C42B 103(2) . . ? 
F4B C47B F5B 109.0(16) . . ? 
F4B C47B F6B 103.4(14) . . ? 
F5B C47B F6B 105.8(15) . . ? 
F4B C47B C44B 112(3) . . ? 
F5B C47B C44B 115.1(16) . . ? 
F6B C47B C44B 111(2) . . ? 
C49 C48 C53 114.8(8) . . ? 
C49 C48 B1 124.1(10) . . ? 
C53 C48 B1 121.0(10) . . ? 
C50 C49 C48 122.7(8) . . ? 
C50 C49 H49A 118.7 . . ? 
C48 C49 H49A 118.7 . . ? 
C51 C50 C49 120.9(8) . . ? 
C51 C50 C55 120.3(8) . . ? 
C49 C50 C55 118.7(8) . . ? 
C50 C51 C52 118.2(9) . . ? 
C50 C51 H51A 120.9 . . ? 
C52 C51 H51A 120.9 . . ? 
C53 C52 C51 120.5(8) . . ? 
C53 C52 C54 118.7(9) . . ? 
C51 C52 C54 120.7(8) . . ? 
C52 C53 C48 122.9(9) . . ? 
C52 C53 H53A 118.6 . . ? 
C48 C53 H53A 118.6 . . ? 
F9 C54 F8 106.7(8) . . ? 
F9 C54 F7 105.1(8) . . ? 
F8 C54 F7 101.5(8) . . ? 
F9 C54 C52 115.1(10) . . ? 
F8 C54 C52 114.7(14) . . ? 
F7 C54 C52 112(2) . . ? 
F11 C55 F12 107.7(9) . . ? 
F11 C55 F10 105.7(8) . . ? 
F12 C55 F10 108.4(9) . . ? 
F11 C55 C50 112.3(13) . . ? 
F12 C55 C50 112.6(10) . . ? 
F10 C55 C50 109.9(9) . . ? 
C49B C48B C53B 115.1(11) . . ? 
C49B C48B B1 122.8(13) . . ? 
C53B C48B B1 121.4(14) . . ? 
C50B C49B C48B 122.3(11) . . ? 
C50B C49B H49B 118.8 . . ? 
C48B C49B H49B 118.8 . . ? 
C51B C50B C49B 121.1(11) . . ? 
C51B C50B C55B 120.7(11) . . ? 
C49B C50B C55B 118.2(11) . . ? 
C50B C51B C52B 118.3(11) . . ? 
C50B C51B H51B 120.9 . . ? 
C52B C51B H51B 120.9 . . ? 
C53B C52B C51B 120.2(11) . . ? 
C53B C52B C54B 118.9(11) . . ? 
C51B C52B C54B 121.0(11) . . ? 
C52B C53B C48B 123.0(11) . . ? 
C52B C53B H53B 118.5 . . ? 
C48B C53B H53B 118.5 . . ? 
F7B C54B F9B 107.4(16) . . ? 
F7B C54B F8B 105.3(16) . . ? 
F9B C54B F8B 104.5(15) . . ? 
F7B C54B C52B 116(2) . . ? 
F9B C54B C52B 113.1(17) . . ? 
F8B C54B C52B 110(3) . . ? 
F10B C55B F12B 104.7(16) . . ? 
F10B C55B F11B 103.7(14) . . ? 
F12B C55B F11B 104.8(15) . . ? 
F10B C55B C50B 117.2(15) . . ? 
F12B C55B C50B 112.6(18) . . ? 
F11B C55B C50B 113(2) . . ? 
 
_diffrn_measured_fraction_theta_max    0.994 
_diffrn_reflns_theta_full              25.60 
_diffrn_measured_fraction_theta_full   0.994 
_diffrn_standards_number         ? 
_diffrn_standards_decay_%        ? 
_diffrn_standards_interval_time  ? 
 
_refine_diff_density_max    0.722 
_refine_diff_density_min   -0.806 
_refine_diff_density_rms    0.074 
_publ_requested_category         FM 
 
_publ_section_references 
; 
Bruker (2010). APEX2. Bruker AXS, Inc., Madison, Wisconsin, USA. 
 
Bruker (2005). SAINT, SHELXTL, XCIF, XPREP.  Bruker AXS, Inc., Madison, 
Wisconsin, USA. 
 
Bruker (2008).  SADABS, TWINABS. Bruker AXS, Inc., Madison, Wisconsin, USA. 
 
CrystalMaker (1994).  CrystalMaker, a crystal and molecular structures 
program for Mac and Windows. CrystalMaker Software Ltd., Oxford, England 
(www.crystalmaker.com). 
 
Dolomanov, O.V., Bourhis, L.J., Gildea, R.J, Howard, J.A.K. & Puschmann, H.
 (2009), J. Appl. Cryst. 42, 339-341.

Sheldrick, G.M. (2008). Acta Cryst. A64, 112-122
; 
 
_publ_section_figure_captions 
; 
Figure 1.  SHELXTL (Bruker, 2005) plot showing 35% probability ellipsoids 
for non-H atoms and circles of arbitrary size for H atoms.  Only the majority 
component of disordered sites is shown. 
; 
 
_publ_section_exptl_prep 
; 
Crystals were grown from a solution of diethylether and pentane. 
; 
 
_publ_section_exptl_refinement 
; 
A structural model of the target molecule was developed.  There is 
disorder in the cation.  The S-(CH2)3-S bridge is disordered over two 
positions.  The like Ni-S, Ru-S, S-C, and C-C distances were restrained to 
be similar (esd 0.01).  The aryl ring coordinated to Ru1 is disordered over 
two positions.  The orientaion of the ring in the minor component is rotated 
180 degrees from the orientation of the major component.  Like Ru-C and like 
C-C distances were restrained to be similar (esd 0.01).  All of the methyl C 
atoms were restrained to behave relatively isotropic. 
 
There is disorder in the anion as well.  Two of the four aromatic rings and 
their CF3 groups are disordered over two positions.  The like B-C, C-C, and 
C-F distances were restrained to be similar (esd 0.005, 0.01, and 0.01 
respectively).  The aromatic rings C40-C45 and C40B-C45B were constrained to 
be perfect hexagons (dist. 1.39/%A).  The atoms of the aromatic rings, C48-C53 
and C48B-C53B, were restrained to be a planar group (esd 0.001).  The other 
four CF3 groups on the anion are disordered over two postions with like C-F 
and F-F distances restrained to be similar (esd 0.01 and 0.02, respectively). 
All F atoms were restrained to behave relatively isotropic.  Rigid-bond 
restraints (esd 0.01) were imposed on displacement parameters for all 
disordered sites except F atoms and methyl C atoms and similar displacement 
amplitudes (esd 0.01) were imposed on disordered sites overlapping by less 
than the sum of van der Waals radii. 
 
Methyl H atom positions, R-CH~3~, were optimized by rotation about R-C bonds 
with idealized C-H, R--H and H--H distances.  Remaining H atoms were 
included as riding idealized contributors.  Methyl H atom U's were assigned 
as 1.5 times U~eq~ of the carrier atom; remaining H atom U's were 
assigned as 1.2 times carrier U~eq~. 
; 
 
loop_ 
 _exptl_crystal_face_index_h 
 _exptl_crystal_face_index_k 
 _exptl_crystal_face_index_l 
 _exptl_crystal_face_perp_dist 
    0.00    0.00   -1.00    0.0860 
    0.00    0.00    1.00    0.0600 
    0.00   -1.00    0.00    0.0310 
    0.00    1.00    0.00    0.0140 
    1.00    0.00    0.00    0.1100 
   -1.00    0.00    0.00    0.1000 
 
#===END

data_mo_uiuc_b82x_0m
_audit_creation_date              2014-01-13
_audit_creation_method            SHELXL-97
_publ_section_exptl_prep
;
Synthesis was carried out by reaction of 
(2,2,6,6-Tetramethyl-piperidin-1-yl)oxyl with 
[(p-cymene)Ru(mu-propanedithiolato)Ni(1,2-bis(diphenylphosphino)ethane)] 
cation in tetrahydrofuran. 
Crystals were grown from vapor diffusion of pentane into THF solution. 
;
_publ_section_exptl_refinement
;
A structural model of the target compound was developed.  Disorder 
is present in both the cation and anion.  In the cation, the dithiolate 
bridge is disordered over two sites. Like C-S, C-C, and C-Ru1 bond 
distances were restrained to be similar (esd 0.01).  In the anion, five 
of the eight CF3 groups are disordered over 2 sites. 
Like C-F bond distances F-C-F bond angles were restrained be similar 
(esd 0.01 and 0.01/%A respectively.) Rigid-bond restraints (esd 0.01) 
were imposed on displacement parameters for disordered carbon atoms in the 
cation and anion.  Similar displacement amplitudes (esd 0.01) were imposed 
on disordered atoms overlapping by less than the sum of van der Waals radii. 
All fluorine atoms were restrained to behave relatively isotropically. Methyl H 
atom positions, R-CH~3~, were optimized by rotation about R-C bonds with 
idealized C-H, R--H and H--H distances.  H atoms were included as riding 
idealized contributors. Methyl H atom U's were assigned as 1.5 times 
U~eq~ of the carrier atom; remaining H atom U's were assigned as 1.2 
times the carrier atom U~eq~. 
;
_publ_section_figure_captions
;
Figure 1.  SHELXTL (Bruker, 2005) plot showing 35% probability ellipsoids 
for non-H atoms and circles of arbitrary size for H atoms.  ??The unlabeled 
atoms are related by the symmetry operator (2-x, -y, -z).?? 
;
_chemical_name_common             ?
_chemical_name_systematic
;
? 
;
_chemical_formula_analytical      ?
_chemical_formula_iupac           ?
_chemical_formula_moiety          'C32 H12 B F24, C39 H43 Ni P2 Ru S2'
_chemical_formula_structural      ?
_chemical_formula_sum             'C71 H55 B F24 Ni P2 Ru S2'
_chemical_formula_weight          1660.80
_chemical_absolute_configuration  ?
_chemical_compound_source         ?
_chemical_melting_point           ?
loop_
  _atom_type_symbol
  _atom_type_description
  _atom_type_scat_dispersion_real
  _atom_type_scat_dispersion_imag
  _atom_type_scat_source
 'C' 'C' 0.0033 0.0016 'International Tables Vol C Tables 4.2.6.8 and 6.1.1.4'
 'H' 'H' 0.0000 0.0000 'International Tables Vol C Tables 4.2.6.8 and 6.1.1.4'
 'B' 'B' 0.0013 0.0007 'International Tables Vol C Tables 4.2.6.8 and 6.1.1.4'
 'F' 'F' 0.0171 0.0103 'International Tables Vol C Tables 4.2.6.8 and 6.1.1.4'
 'Ni' 'Ni' 0.3393 1.1124 'International Tables Vol C Tables 4.2.6.8 and 6.1.1.4'
 'P' 'P' 0.1023 0.0942 'International Tables Vol C Tables 4.2.6.8 and 6.1.1.4'
 'S' 'S' 0.1246 0.1234 'International Tables Vol C Tables 4.2.6.8 and 6.1.1.4'
 'Ru' 'Ru' -1.2594 0.8363
 'International Tables Vol C Tables 4.2.6.8 and 6.1.1.4'

_space_group_crystal_system       'monoclinic'
_space_group_IT_number            14
_space_group_name_H-M_alt         'P 1 21/n 1'
_space_group_name_Hall            '-P 2yn'
loop_
  _space_group_symop_id
  _space_group_symop_operation_xyz
 1 'x, y, z'
 2 '-x+1/2, y+1/2, -z+1/2'
 3 '-x, -y, -z'
 4 'x-1/2, -y-1/2, z-1/2'

_cell_length_a                    11.9100(9)
_cell_length_b                    16.8607(11)
_cell_length_c                    34.616(3)
_cell_angle_alpha                 90.00
_cell_angle_beta                  96.940(3)
_cell_angle_gamma                 90.00
_cell_volume                      6900.3(9)
_cell_formula_units_Z             4
_cell_measurement_reflns_used     0
_cell_measurement_temperature     100
_cell_measurement_theta_max       0.000
_cell_measurement_theta_min       0.000
_exptl_absorpt_coefficient_mu     0.706
_exptl_absorpt_correction_T_max   1.0000
_exptl_absorpt_correction_T_min   0.8402
_exptl_absorpt_correction_type    multi-scan
_exptl_absorpt_process_details
'SADABS-2008/1 (Bruker,2008) was used for absorption correction. wR2(int) was 0.0775 before and 0.0703 after correction. The Ratio of minimum to maximum transmission is 0.8402. The \l/2 correction factor is 0.0015.'
_exptl_crystal_colour             green
_exptl_crystal_colour_lustre      .
_exptl_crystal_colour_modifier    .
_exptl_crystal_colour_primary     green
_exptl_crystal_density_diffrn     1.599
_exptl_crystal_density_meas       ?
_exptl_crystal_density_method     'not measured'
_exptl_crystal_description        'prism'
_exptl_crystal_F_000              3344
_exptl_crystal_id                 ?
_exptl_crystal_preparation        ?
_exptl_crystal_recrystallization_method ?
_exptl_crystal_size_max           0.146
_exptl_crystal_size_mid           0.09
_exptl_crystal_size_min           0.052
_exptl_special_details
;
One distinct cell was identified using APEX2 (Bruker, 2010) and 
Cell_Now (Sheldrick, 2004).  Three frame series were integrated 
and filtered for statistical outliers using SAINT (Bruker, 2005) 
then corrected for absorption by integration using using SADABS 
(Bruker, 2005). SADABS was also used to sort, merge, and scale 
the combined data.  No decay correction was applied. 
;
_diffrn_reflns_av_R_equivalents   0.0794
_diffrn_reflns_av_unetI/netI      0.0476
_diffrn_reflns_limit_h_max        14
_diffrn_reflns_limit_h_min        -14
_diffrn_reflns_limit_k_max        20
_diffrn_reflns_limit_k_min        -20
_diffrn_reflns_limit_l_max        42
_diffrn_reflns_limit_l_min        -42
_diffrn_reflns_number             102997
_diffrn_reflns_theta_full         25.74
_diffrn_reflns_theta_max          25.74
_diffrn_reflns_theta_min          2.10
_diffrn_ambient_temperature       100.0
_diffrn_detector_area_resol_mean  ?
_diffrn_measured_fraction_theta_full 0.997
_diffrn_measured_fraction_theta_max 0.997
_diffrn_measurement_device        'Bruker Kappa/ApexII CCD'
_diffrn_measurement_device_type   ?
_diffrn_measurement_method        'profile data from \f and \w scans'
_diffrn_radiation_monochromator   'multilayer optics''
_diffrn_radiation_type            'MoK\a'
_diffrn_radiation_wavelength      0.71073
_diffrn_radiation_wavelength_id   ?
_diffrn_source                    'fine-focus sealed tube'
_diffrn_standards_decay_%         ?
_diffrn_standards_interval_time   ?
_diffrn_standards_number          ?
_reflns_number_gt                 10180
_reflns_number_total              13163
_reflns_threshold_expression      >2sigma(I)
_computing_cell_refinement        'SAINT V7.68A (Bruker, 2005)'
_computing_data_collection        'APEX2 V2013.2-0 (Bruker, 2013)'
_computing_data_reduction         'SAINT v8.27A (Bruker, 2012)'
_computing_molecular_graphics     'Olex2 (Dolomanov et al., 2009)'
_computing_publication_material   'Olex2 (Dolomanov et al., 2009)'
_computing_structure_refinement   'XL (Sheldrick, 2008)'
_computing_structure_solution     'SHELXTL V6.12 (Bruker, 2005)'
_refine_diff_density_max          1.902
_refine_diff_density_min          -0.700
_refine_diff_density_rms          0.076
_refine_ls_abs_structure_details  '?'
_refine_ls_extinction_coef        ?
_refine_ls_extinction_method      none
_refine_ls_goodness_of_fit_ref    1.028
_refine_ls_hydrogen_treatment     mixed
_refine_ls_matrix_type            full
_refine_ls_number_parameters      1102
_refine_ls_number_reflns          13163
_refine_ls_number_restraints      1915
_refine_ls_R_factor_all           0.0669
_refine_ls_R_factor_gt            0.0433
_refine_ls_restrained_S_all       1.057
_refine_ls_shift/su_max           0.004
_refine_ls_shift/su_mean          0.000
_refine_ls_structure_factor_coef  Fsqd
_refine_ls_weighting_details
'calc w=1/[\s^2^(Fo^2^)+(0.0315P)^2^+12.9763P] where P=(Fo^2^+2Fc^2^)/3'
_refine_ls_weighting_scheme       calc
_refine_ls_wR_factor_gt           0.0880
_refine_ls_wR_factor_ref          0.0966
_refine_special_details
;
Structure was phased by charge flipping (Bourhis, 2011).  Systematic 
conditions suggested the unambiguous space group P2~1~/n.  The space group 
choice was confirmed by successful convergence of the full-matrix 
least-squares refinement on F^2^.  The highest peaks in the final 
difference Fourier map were in the vicinity of the atom Ru1; the 
final map had no other significant features.  A final analysis of 
variance between observed and calculated structure factors showed minor 
dependence on amplitude and no dependence on resolution. 
 
 
The F~o~^2^ were significantly greater than F~c~^2^. However, no obvious 
twinning could be found. The most disagreeable reflections were primarily 
along the longest axis. 
;
_olex2_refinement_description
;
1. Fixed Uiso
 At 1.2 times of:
  All C(H) groups, All C(H,H) groups, All S(H) groups
 At 1.5 times of:
  All C(H,H,H) groups
2. Restrained distances
 C5-C8B \\sim C5-C8A
 with sigma of 0.01
 C32-C27 \\sim C31-C29 \\sim C16-C13 \\sim C24-C21 \\sim C7-C3 \\sim C8A-C5
 \\sim C8B-C5 \\sim C15A-C11 \\sim C15B-C11 \\sim C23-C19
 with sigma of 0.01
 F13A-F14A \\sim F13A-F15A \\sim F14A-F15A \\sim F13B-F14B \\sim F13B-F15B
 \\sim F14B-F15B \\sim F19A-F20A \\sim F19A-F21A \\sim F20A-F21A 
 \\sim F19B-F20B \\sim F19B-F21B \\sim F20B-F21B \\sim F7A-F8A
 \\sim F7A-F9A \\sim F8A-F9A \\sim F1A-F2A \\sim F1A-F3A \\sim F2A-F3A 
 \\sim F1B-F2B \\sim F1B-F3B \\sim F2B-F3B
 \\sim F4-F5 \\sim F4-F6 \\sim F5-F6 \\sim F7A-F8A \\sim F7A-F9A \\sim F8A-F9A
 \\sim F7B-F8B \\sim F7B-F9B \\sim F8B-F9B \\sim F10-F11 \\sim F10-F12 
 \\sim F11-F12 \\sim F16-F17 \\sim F16-F18
 \\sim F17-F18 \\sim F22A-F24A \\sim F22A-F23A \\sim F23A-F24A \\sim F22B-F23B
 \\sim F22B-F24B \\sim F23B-F24B
 with sigma of 0.01
 F13A-C32 \\sim F13B-C32 \\sim F15A-C32 \\sim F15B-C32 \\sim F14A-C32 
 \\sim F14B-C32 \\sim F8A-C15A \\sim F9A-C15A \\sim F7A-C15A \\sim F8B-C15B
 \\sim F9B-C15B \\sim F7B-C15B \\sim F12-C16 \\sim F11-C16 \\sim F10-C16 
 \\sim F3A-C8A \\sim F1A-C8A \\sim F2A-C8A \\sim F3B-C8B \\sim F1B-C8B
 \\sim F2B-C8B \\sim F19A-C24 \\sim F19B-C24 \\sim F20A-C24 \\sim F20B-C24 
 \\sim F21A-C24 \\sim F21B-C24 \\sim F22A-C23 \\sim F24A-C23 \\sim F23B-C23
 \\sim F18-C31 \\sim F17-C31 \\sim F16-C31 \\sim F6-C7 \\sim F5-C7
 \\sim F4-C7 \\sim F22B-C23 \\sim F23B-C23 \\sim F24B-C23
 with sigma of 0.01
 C43B-C44B \\sim C43A-C44A
 with sigma of 0.01
 Ru1-C43B \\sim Ru1-C43A
 with sigma of 0.01
 S1-C43B \\sim S2-C43A
 with sigma of 0.01
 S2-C43A \\sim S1-C43B
 with sigma of 0.01
 C45A-C44A \\sim C45B-C44B
 with sigma of 0.01
 S1-C45A \\sim S2-C45B
 with sigma of 0.01
3. Rigid bond restraints
 C43A, C44A, C44B, C43B, C45A, C45B, C44A, C44B
 with sigma for 1-2 distances of 0.01 and sigma for 1-3 distances of 0.01
4. Uiso/Uaniso restraints and constraints
F1A \\sim F1B \\sim F2A \\sim F2B \\sim F3A \\sim F3B \\sim F4 \\sim F5 \\sim
F6 \\sim F7A \\sim F7B \\sim F8A \\sim F8B \\sim F9A \\sim F9B \\sim F10 \\sim
F11 \\sim F12 \\sim F13A \\sim F13B \\sim F14A \\sim F14B \\sim F15A \\sim F15B
\\sim F16 \\sim F17 \\sim F18 \\sim F19A \\sim F19B \\sim F20A \\sim F20B \\sim
F21A \\sim F21B \\sim F22A \\sim F24A \\sim F23B \\sim F24B \\sim F23A \\sim
F22B: within 1.7A with sigma of 0.01 and sigma for terminal atoms of 0.01
C44B \\sim C44A \\sim C43B \\sim C43A \\sim C44A \\sim C44B \\sim C45A \\sim
C45B: within 1.7A with sigma of 0.01 and sigma for terminal atoms of 0.02
Uanis(F1A) \\sim Ueq, Uanis(F1B) \\sim Ueq, Uanis(F2A) \\sim Ueq, Uanis(F2B)
\\sim Ueq, Uanis(F3A) \\sim Ueq, Uanis(F3B) \\sim Ueq, Uanis(F4) \\sim Ueq,
Uanis(F5) \\sim Ueq, Uanis(F6) \\sim Ueq, Uanis(F7A) \\sim Ueq, Uanis(F7B)
\\sim Ueq, Uanis(F8A) \\sim Ueq, Uanis(F8B) \\sim Ueq, Uanis(F9A) \\sim Ueq,
Uanis(F9B) \\sim Ueq, Uanis(F10) \\sim Ueq, Uanis(F11) \\sim Ueq, Uanis(F12)
\\sim Ueq, Uanis(F13A) \\sim Ueq, Uanis(F13B) \\sim Ueq, Uanis(F14A) \\sim Ueq,
Uanis(F14B) \\sim Ueq, Uanis(F15A) \\sim Ueq, Uanis(F15B) \\sim Ueq, Uanis(F16)
\\sim Ueq, Uanis(F17) \\sim Ueq, Uanis(F18) \\sim Ueq, Uanis(F19A) \\sim Ueq,
Uanis(F19B) \\sim Ueq, Uanis(F20A) \\sim Ueq, Uanis(F20B) \\sim Ueq,
Uanis(F21A) \\sim Ueq, Uanis(F21B) \\sim Ueq, Uanis(F22A) \\sim Ueq,
Uanis(F24A) \\sim Ueq, Uanis(F23B) \\sim Ueq, Uanis(F24B) \\sim Ueq,
Uanis(F23A) \\sim Ueq, Uanis(F22B) \\sim Ueq: with sigma of 0.01 and sigma for
terminal atoms of 0.01
Uanis(C8A) = Uanis(C8B)
Uanis(C15A) = Uanis(C15B)
5. Others
 1*[Sof(F13A)+Sof(F14A)+Sof(F15A)]+1*[Sof(F13B)+Sof(F14B)+Sof(F15B)]=1 with
 esd of 0.0001
 Sof(F13A)=Sof(F14A)=Sof(F15A)=FVAR(1)
 Sof(F19B)=Sof(F20B)=Sof(F21B)=1-FVAR(2)
 Sof(F19A)=Sof(F20A)=Sof(F21A)=FVAR(2)
 Sof(C43B)=Sof(C44B)=Sof(H44C)=Sof(H44D)=Sof(C45B)=Sof(H45C)=Sof(H45D)=
 Sof(H43B)=1-FVAR(3)
 Sof(C43A)=Sof(H43A)=Sof(C44A)=Sof(H44A)=Sof(H44B)=Sof(C45A)=Sof(H45A)=
 Sof(H45B)=FVAR(3)
 Sof(F13B)=Sof(F14B)=Sof(F15B)=FVAR(4)
 Sof(C8B)=Sof(F1B)=Sof(F2B)=Sof(F3B)=1-FVAR(5)
 Sof(C8A)=Sof(F1A)=Sof(F2A)=Sof(F3A)=FVAR(5)
 Sof(C15B)=Sof(F7B)=Sof(F8B)=Sof(F9B)=Sof(F23B)=Sof(F24B)=Sof(F22B)=1-FVAR(6)
 Sof(C15A)=Sof(F7A)=Sof(F8A)=Sof(F9A)=Sof(F22A)=Sof(F24A)=Sof(F23A)=FVAR(6)
6.a Ternary CH refined with riding coordinates:
 C39(H39)
6.b Secondary CH2 refined with riding coordinates:
 C44A(H44A,H44B), C44B(H44C,H44D), C45A(H45A,H45B), C45B(H45C,H45D), C70(H70A,
 H70B), C71(H71A,H71B)
6.c Aromatic/amide H refined with riding coordinates:
 C2(H2), C4(H4), C6(H6), C10(H10), C12(H12), C14(H14), C18(H18), C20(H20),
 C22(H22), C26(H26), C28(H28), C30(H30), C34(H34), C35(H35), C37(H37), C38(H38),
  C47(H47), C48(H48), C49(H49), C50(H50), C51(H51), C53(H53), C54(H54),
 C55(H55), C56(H56), C57(H57), C59(H59), C60(H60), C61(H61), C62(H62), C63(H63),
  C65(H65), C66(H66), C67(H67), C68(H68), C69(H69)
6.d Idealised Me refined as rotating group:
 C40(H40A,H40B,H40C), C41(H41A,H41B,H41C), C42(H42A,H42B,H42C)
;
_atom_sites_solution_hydrogens    geom
_atom_sites_solution_primary      direct
_atom_sites_solution_secondary    difmap
loop_
  _atom_site_label
  _atom_site_type_symbol
  _atom_site_fract_x
  _atom_site_fract_y
  _atom_site_fract_z
  _atom_site_U_iso_or_equiv
  _atom_site_adp_type
  _atom_site_occupancy
  _atom_site_symmetry_multiplicity
  _atom_site_calc_flag
  _atom_site_disorder_assembly
  _atom_site_disorder_group
  _atom_site_refinement_flags_posn
  _atom_site_refinement_flags_adp
 B1 B -0.0720(3) 0.6329(2) 0.13224(10) 0.0171(8) Uani 1 1 d A . . .
 C1 C 0.0623(3) 0.61109(17) 0.14327(8) 0.0160(7) Uani 1 1 d A . . .
 C2 C 0.1128(3) 0.59804(17) 0.18148(9) 0.0181(7) Uani 1 1 d A . . .
 H2 H 0.0669 0.5994 0.2021 0.022 Uiso 1 1 calc A . R .
 C3 C 0.2281(3) 0.58321(17) 0.19010(8) 0.0173(7) Uani 1 1 d A . . .
 C4 C 0.2984(3) 0.58220(18) 0.16141(9) 0.0205(7) Uani 1 1 d A . . .
 H4 H 0.3767 0.5710 0.1673 0.025 Uiso 1 1 calc A . R .
 C5 C 0.2514(3) 0.59807(18) 0.12345(9) 0.0207(7) Uani 1 1 d A . . .
 C6 C 0.1360(3) 0.61200(17) 0.11489(9) 0.0189(7) Uani 1 1 d A . . .
 H6 H 0.1062 0.6225 0.0887 0.023 Uiso 1 1 calc A . R .
 C7 C 0.2773(3) 0.57149(17) 0.23178(9) 0.0236(7) Uani 1 1 d A . . .
 C8A C 0.3242(9) 0.6061(9) 0.0914(3) 0.0320(10) Uani 0.272(17) 1 d A 1 . .
 C8B C 0.3271(4) 0.5961(4) 0.09224(15) 0.0320(10) Uani 0.728(17) 1 d A 2 . .
 C9 C -0.1270(3) 0.58844(18) 0.09204(9) 0.0180(7) Uani 1 1 d . . . .
 C10 C -0.0818(3) 0.51981(18) 0.07734(9) 0.0215(7) Uani 1 1 d A . . .
 H10 H -0.0144 0.4982 0.0908 0.026 Uiso 1 1 calc . . R .
 C11 C -0.1313(3) 0.48208(18) 0.04400(9) 0.0246(8) Uani 1 1 d . . . .
 C12 C -0.2297(3) 0.51062(19) 0.02359(9) 0.0241(8) Uani 1 1 d A . . .
 H12 H -0.2635 0.4849 0.0007 0.029 Uiso 1 1 calc . . R .
 C13 C -0.2778(3) 0.57825(19) 0.03763(9) 0.0204(7) Uani 1 1 d . . . .
 C14 C -0.2276(3) 0.61556(18) 0.07116(9) 0.0198(7) Uani 1 1 d A . . .
 H14 H -0.2629 0.6613 0.0803 0.024 Uiso 1 1 calc . . R .
 C15A C -0.0715(13) 0.4134(7) 0.0282(4) 0.0385(12) Uani 0.301(19) 1 d A 1 . .
 C15B C -0.0818(7) 0.4065(3) 0.03127(19) 0.0385(12) Uani 0.699(19) 1 d A 2 . .
 C16 C -0.3811(3) 0.61404(19) 0.01592(9) 0.0262(8) Uani 1 1 d A . . .
 C17 C -0.0737(3) 0.72936(18) 0.12756(9) 0.0171(7) Uani 1 1 d . . . .
 C18 C -0.0577(3) 0.77777(19) 0.16090(9) 0.0208(7) Uani 1 1 d A . . .
 H18 H -0.0511 0.7533 0.1858 0.025 Uiso 1 1 calc . . R .
 C19 C -0.0512(3) 0.85967(19) 0.15887(9) 0.0230(7) Uani 1 1 d . . . .
 C20 C -0.0593(3) 0.89761(18) 0.12304(9) 0.0214(7) Uani 1 1 d A . . .
 H20 H -0.0563 0.9538 0.1215 0.026 Uiso 1 1 calc . . R .
 C21 C -0.0718(3) 0.85156(18) 0.08972(9) 0.0187(7) Uani 1 1 d . . . .
 C22 C -0.0795(3) 0.76918(18) 0.09216(9) 0.0176(7) Uani 1 1 d A . . .
 H22 H -0.0892 0.7391 0.0688 0.021 Uiso 1 1 calc . . R .
 C23 C -0.0288(3) 0.90716(18) 0.19543(10) 0.0365(10) Uani 1 1 d A . . .
 C24 C -0.0790(2) 0.88914(16) 0.05032(9) 0.0251(8) Uani 1 1 d A . . .
 C25 C -0.1493(3) 0.60409(18) 0.16574(9) 0.0179(7) Uani 1 1 d . . . .
 C26 C -0.1338(3) 0.52943(18) 0.18378(9) 0.0191(7) Uani 1 1 d A . . .
 H26 H -0.0765 0.4953 0.1765 0.023 Uiso 1 1 calc . . R .
 C27 C -0.1994(3) 0.50404(18) 0.21183(9) 0.0208(7) Uani 1 1 d . . . .
 C28 C -0.2865(3) 0.55045(19) 0.22258(9) 0.0207(7) Uani 1 1 d A . . .
 H28 H -0.3321 0.5325 0.2415 0.025 Uiso 1 1 calc . . R .
 C29 C -0.3050(3) 0.62387(18) 0.20483(9) 0.0177(7) Uani 1 1 d . . . .
 C30 C -0.2378(3) 0.64912(18) 0.17706(8) 0.0168(7) Uani 1 1 d A . . .
 H30 H -0.2529 0.6995 0.1652 0.020 Uiso 1 1 calc . . R .
 C31 C -0.3947(3) 0.67794(18) 0.21604(9) 0.0249(8) Uani 1 1 d A . . .
 C32 C -0.1750(3) 0.42650(18) 0.23186(9) 0.0288(8) Uani 1 1 d A . . .
 C33 C 0.1998(3) 0.84655(18) 0.34922(10) 0.0280(8) Uani 1 1 d B . . .
 C34 C 0.1779(3) 0.8325(2) 0.38817(10) 0.0321(9) Uani 1 1 d B . . .
 H34 H 0.2348 0.8091 0.4062 0.039 Uiso 1 1 calc . . R .
 C35 C 0.0739(4) 0.8526(2) 0.40026(11) 0.0359(9) Uani 1 1 d B . . .
 H35 H 0.0612 0.8426 0.4264 0.043 Uiso 1 1 calc . . R .
 C36 C -0.0135(4) 0.8880(2) 0.37419(12) 0.0382(10) Uani 1 1 d B . . .
 C37 C 0.0086(3) 0.90269(19) 0.33580(11) 0.0343(9) Uani 1 1 d B . . .
 H37 H -0.0484 0.9263 0.3179 0.041 Uiso 1 1 calc . . R .
 C38 C 0.1130(3) 0.88317(18) 0.32344(10) 0.0294(9) Uani 1 1 d B . . .
 H38 H 0.1260 0.8946 0.2975 0.035 Uiso 1 1 calc . . R .
 C39 C 0.3126(3) 0.8219(2) 0.33718(12) 0.0373(9) Uani 1 1 d . . . .
 H39 H 0.3295 0.7673 0.3476 0.045 Uiso 1 1 calc . . R .
 C40 C 0.3142(4) 0.8187(3) 0.29330(13) 0.0519(12) Uani 1 1 d . . . .
 H40A H 0.3079 0.8725 0.2826 0.078 Uiso 1 1 calc . . GR .
 H40B H 0.2504 0.7866 0.2815 0.078 Uiso 1 1 calc . . GR .
 H40C H 0.3853 0.7947 0.2875 0.078 Uiso 1 1 calc . . GR .
 C41 C 0.4047(4) 0.8770(2) 0.35637(14) 0.0512(12) Uani 1 1 d . . . .
 H41A H 0.4788 0.8584 0.3505 0.077 Uiso 1 1 calc . . GR .
 H41B H 0.4030 0.8770 0.3846 0.077 Uiso 1 1 calc . . GR .
 H41C H 0.3915 0.9309 0.3463 0.077 Uiso 1 1 calc . . GR .
 C42 C -0.1267(4) 0.9073(3) 0.38732(16) 0.0607(13) Uani 1 1 d . . . .
 H42A H -0.1858 0.9036 0.3651 0.091 Uiso 1 1 calc . . GR .
 H42B H -0.1249 0.9613 0.3979 0.091 Uiso 1 1 calc . . GR .
 H42C H -0.1428 0.8696 0.4075 0.091 Uiso 1 1 calc . . GR .
 C43A C 0.0172(5) 0.7191(3) 0.29188(14) 0.0236(12) Uani 0.628(5) 1 d B 1 . U
 H43A H 0.053(5) 0.740(3) 0.2696(17) 0.028 Uiso 0.628(5) 1 d B 1 R .
 C43B C -0.1175(7) 0.7395(5) 0.3186(2) 0.028(2) Uani 0.372(5) 1 d B 2 . U
 C44A C -0.1001(9) 0.6902(6) 0.2778(3) 0.0285(19) Uani 0.628(5) 1 d B 1 . U
 H44A H -0.0953 0.6495 0.2575 0.034 Uiso 0.628(5) 1 calc B 1 R .
 H44B H -0.1450 0.7351 0.2657 0.034 Uiso 0.628(5) 1 calc B 1 R .
 C44B C -0.1161(17) 0.6903(11) 0.2826(5) 0.031(3) Uani 0.372(5) 1 d B 2 . U
 H44C H -0.1263 0.7257 0.2596 0.038 Uiso 0.372(5) 1 calc B 2 R .
 H44D H -0.1810 0.6533 0.2806 0.038 Uiso 0.372(5) 1 calc B 2 R .
 C45A C -0.1613(5) 0.6554(4) 0.30971(15) 0.0315(14) Uani 0.628(5) 1 d B 1 . U
 H45A H -0.1540 0.5969 0.3091 0.038 Uiso 0.628(5) 1 calc B 1 R .
 H45B H -0.2427 0.6684 0.3042 0.038 Uiso 0.628(5) 1 calc B 1 R .
 C45B C -0.0090(8) 0.6433(6) 0.2817(3) 0.041(2) Uani 0.372(5) 1 d B 2 . U
 H45C H 0.0185 0.6535 0.2563 0.049 Uiso 0.372(5) 1 calc B 2 R .
 H45D H -0.0294 0.5864 0.2822 0.049 Uiso 0.372(5) 1 calc B 2 R .
 C46 C 0.2034(3) 0.45794(18) 0.36454(9) 0.0197(7) Uani 1 1 d . . . .
 C47 C 0.1309(3) 0.44307(19) 0.33071(10) 0.0261(8) Uani 1 1 d . . . .
 H47 H 0.0810 0.4834 0.3199 0.031 Uiso 1 1 calc . . R .
 C48 C 0.1311(3) 0.3696(2) 0.31269(12) 0.0369(9) Uani 1 1 d . . . .
 H48 H 0.0812 0.3597 0.2896 0.044 Uiso 1 1 calc . . R .
 C49 C 0.2036(3) 0.3110(2) 0.32819(13) 0.0383(10) Uani 1 1 d . . . .
 H49 H 0.2044 0.2609 0.3156 0.046 Uiso 1 1 calc . . R .
 C50 C 0.2751(3) 0.3246(2) 0.36199(13) 0.0367(10) Uani 1 1 d . . . .
 H50 H 0.3240 0.2837 0.3728 0.044 Uiso 1 1 calc . . R .
 C51 C 0.2758(3) 0.3978(2) 0.38020(11) 0.0286(8) Uani 1 1 d . . . .
 H51 H 0.3256 0.4071 0.4033 0.034 Uiso 1 1 calc . . R .
 C52 C 0.3345(3) 0.60013(18) 0.38456(9) 0.0211(7) Uani 1 1 d . . . .
 C53 C 0.3877(3) 0.6479(2) 0.41434(11) 0.0314(9) Uani 1 1 d . . . .
 H53 H 0.3539 0.6554 0.4376 0.038 Uiso 1 1 calc . . R .
 C54 C 0.4893(3) 0.6842(2) 0.41001(13) 0.0420(11) Uani 1 1 d . . . .
 H54 H 0.5259 0.7160 0.4304 0.050 Uiso 1 1 calc . . R .
 C55 C 0.5382(3) 0.6743(2) 0.37595(14) 0.0449(11) Uani 1 1 d . . . .
 H55 H 0.6084 0.6991 0.3732 0.054 Uiso 1 1 calc . . R .
 C56 C 0.4854(3) 0.6289(2) 0.34622(13) 0.0387(10) Uani 1 1 d . . . .
 H56 H 0.5185 0.6231 0.3227 0.046 Uiso 1 1 calc . . R .
 C57 C 0.3841(3) 0.59155(19) 0.35039(10) 0.0261(8) Uani 1 1 d . . . .
 H57 H 0.3481 0.5599 0.3298 0.031 Uiso 1 1 calc . . R .
 C58 C -0.0537(3) 0.46987(18) 0.41538(9) 0.0187(7) Uani 1 1 d . . . .
 C59 C -0.0173(3) 0.40720(19) 0.43993(9) 0.0252(8) Uani 1 1 d . . . .
 H59 H 0.0248 0.4174 0.4645 0.030 Uiso 1 1 calc . . R .
 C60 C -0.0428(3) 0.3297(2) 0.42843(10) 0.0327(9) Uani 1 1 d . . . .
 H60 H -0.0177 0.2869 0.4452 0.039 Uiso 1 1 calc . . R .
 C61 C -0.1042(3) 0.3144(2) 0.39290(10) 0.0295(8) Uani 1 1 d . . . .
 H61 H -0.1196 0.2612 0.3849 0.035 Uiso 1 1 calc . . R .
 C62 C -0.1433(3) 0.3764(2) 0.36882(10) 0.0301(8) Uani 1 1 d . . . .
 H62 H -0.1879 0.3658 0.3447 0.036 Uiso 1 1 calc . . R .
 C63 C -0.1179(3) 0.4537(2) 0.37974(10) 0.0252(8) Uani 1 1 d . . . .
 H63 H -0.1441 0.4960 0.3629 0.030 Uiso 1 1 calc . . R .
 C64 C -0.1115(3) 0.61912(18) 0.45186(9) 0.0185(7) Uani 1 1 d . . . .
 C65 C -0.0897(3) 0.69617(19) 0.46547(10) 0.0252(8) Uani 1 1 d . . . .
 H65 H -0.0239 0.7232 0.4596 0.030 Uiso 1 1 calc . . R .
 C66 C -0.1639(3) 0.7331(2) 0.48751(10) 0.0282(8) Uani 1 1 d . . . .
 H66 H -0.1485 0.7854 0.4970 0.034 Uiso 1 1 calc . . R .
 C67 C -0.2603(3) 0.6943(2) 0.49583(10) 0.0260(8) Uani 1 1 d . . . .
 H67 H -0.3103 0.7194 0.5114 0.031 Uiso 1 1 calc . . R .
 C68 C -0.2841(3) 0.61879(19) 0.48146(9) 0.0239(7) Uani 1 1 d . . . .
 H68 H -0.3513 0.5926 0.4867 0.029 Uiso 1 1 calc . . R .
 C69 C -0.2101(3) 0.58137(19) 0.45951(9) 0.0217(7) Uani 1 1 d . . . .
 H69 H -0.2269 0.5296 0.4496 0.026 Uiso 1 1 calc . . R .
 C70 C 0.1184(3) 0.56369(19) 0.46135(9) 0.0215(7) Uani 1 1 d . . . .
 H70A H 0.1433 0.6172 0.4706 0.026 Uiso 1 1 calc . . R .
 H70B H 0.1011 0.5322 0.4840 0.026 Uiso 1 1 calc . . R .
 C71 C 0.2114(3) 0.5234(2) 0.44191(9) 0.0244(8) Uani 1 1 d . . . .
 H71A H 0.2043 0.4651 0.4440 0.029 Uiso 1 1 calc . . R .
 H71B H 0.2863 0.5392 0.4553 0.029 Uiso 1 1 calc . . R .
 F1A F 0.4242(11) 0.6395(13) 0.1033(4) 0.048(3) Uani 0.272(17) 1 d A 1 . U
 F1B F 0.4364(3) 0.5949(6) 0.10587(12) 0.0544(17) Uani 0.728(17) 1 d A 2 . U
 F2A F 0.3468(17) 0.5354(8) 0.0764(6) 0.047(4) Uani 0.272(17) 1 d A 1 . U
 F2B F 0.3090(7) 0.5320(3) 0.0694(2) 0.0516(15) Uani 0.728(17) 1 d A 2 . U
 F3A F 0.2789(16) 0.6496(11) 0.0611(6) 0.050(4) Uani 0.272(17) 1 d A 1 . U
 F3B F 0.3104(7) 0.6581(4) 0.0684(2) 0.0486(15) Uani 0.728(17) 1 d A 2 . U
 F4 F 0.37893(16) 0.53645(11) 0.23491(5) 0.0327(5) Uani 1 1 d . . . U
 F5 F 0.21127(17) 0.52728(12) 0.25177(6) 0.0387(5) Uani 1 1 d . . . U
 F6 F 0.29277(17) 0.64049(11) 0.25091(5) 0.0323(5) Uani 1 1 d . . . U
 F7A F -0.1177(15) 0.3455(10) 0.0388(5) 0.054(3) Uani 0.301(19) 1 d A 1 . U
 F7B F -0.1049(7) 0.3445(4) 0.0533(3) 0.0568(15) Uani 0.699(19) 1 d A 2 . U
 F8A F -0.0759(16) 0.4098(10) -0.0107(3) 0.045(3) Uani 0.301(19) 1 d A 1 . U
 F8B F -0.1201(8) 0.3864(4) -0.00538(18) 0.0523(18) Uani 0.699(19) 1 d A 2 . U
 F9A F 0.0385(14) 0.4087(19) 0.0420(6) 0.054(4) Uani 0.301(19) 1 d A 1 . U
 F9B F 0.0311(7) 0.4101(8) 0.0333(3) 0.0559(17) Uani 0.699(19) 1 d A 2 . U
 F10 F -0.45996(18) 0.63177(16) 0.03885(6) 0.0514(7) Uani 1 1 d . . . U
 F11 F -0.35900(18) 0.68318(12) -0.00125(6) 0.0414(6) Uani 1 1 d . . . U
 F12 F -0.43078(17) 0.56815(12) -0.01265(6) 0.0361(5) Uani 1 1 d . . . U
 F13A F -0.1202(7) 0.3765(4) 0.2118(2) 0.062(2) Uani 0.437(4) 1 d A 1 . U
 F13B F -0.0733(4) 0.3962(3) 0.22715(17) 0.0539(16) Uani 0.563(4) 1 d A 2 . U
 F14A F -0.2691(4) 0.3894(4) 0.2397(2) 0.0437(16) Uani 0.437(4) 1 d A 1 . U
 F14B F -0.2492(4) 0.3708(3) 0.21951(17) 0.0608(16) Uani 0.563(4) 1 d A 2 . U
 F15A F -0.1149(6) 0.4367(5) 0.26645(18) 0.061(2) Uani 0.437(4) 1 d A 1 . U
 F15B F -0.1737(5) 0.4309(4) 0.27051(12) 0.0567(16) Uani 0.563(4) 1 d A 2 . U
 F16 F -0.4342(2) 0.65700(14) 0.24894(7) 0.0533(7) Uani 1 1 d . . . U
 F17 F -0.48380(17) 0.68229(13) 0.18875(6) 0.0459(6) Uani 1 1 d . . . U
 F18 F -0.35827(17) 0.75273(11) 0.22130(7) 0.0405(6) Uani 1 1 d . . . U
 F19A F -0.1867(6) 0.8967(13) 0.0339(5) 0.030(2) Uani 0.55(6) 1 d A 1 . U
 F19B F -0.1805(10) 0.8818(14) 0.0292(7) 0.032(3) Uani 0.45(6) 1 d A 2 . U
 F20A F -0.0278(18) 0.8456(11) 0.0250(4) 0.032(2) Uani 0.55(6) 1 d A 1 . U
 F20B F -0.0040(19) 0.8588(13) 0.0287(6) 0.038(3) Uani 0.45(6) 1 d A 2 . U
 F21A F -0.0332(19) 0.9616(6) 0.0502(6) 0.042(3) Uani 0.55(6) 1 d A 1 . U
 F21B F -0.058(2) 0.9671(5) 0.0531(7) 0.035(3) Uani 0.45(6) 1 d A 2 . U
 F22A F -0.0756(16) 0.9796(7) 0.1923(9) 0.045(4) Uani 0.301(19) 1 d A 1 . U
 F24A F 0.0807(7) 0.9187(12) 0.2077(6) 0.046(4) Uani 0.301(19) 1 d A 1 . U
 F23B F -0.0382(8) 0.8667(5) 0.2282(2) 0.0424(16) Uani 0.699(19) 1 d A 2 . U
 Ni2 Ni 0.04655(3) 0.62105(2) 0.373707(11) 0.01656(10) Uani 1 1 d B . . .
 P1 P 0.20042(7) 0.55235(5) 0.38973(2) 0.01805(18) Uani 1 1 d . . . .
 P2 P -0.00761(7) 0.57143(5) 0.42554(2) 0.01752(18) Uani 1 1 d . . . .
 Ru1 Ru 0.04142(3) 0.777705(15) 0.347237(8) 0.02475(8) Uani 1 1 d . . . .
 S1 S -0.10756(8) 0.69152(5) 0.36052(3) 0.0302(2) Uani 1 1 d B . . .
 S2 S 0.11116(8) 0.65953(5) 0.32001(2) 0.0257(2) Uani 1 1 d B . . .
 H43B H -0.187(8) 0.778(6) 0.318(3) 0.031 Uiso 0.372(5) 1 d B 2 R .
 F24B F 0.0765(4) 0.9367(6) 0.1993(3) 0.0529(18) Uani 0.699(19) 1 d A 2 . U
 F23A F -0.0746(15) 0.8716(13) 0.2243(6) 0.044(4) Uani 0.301(19) 1 d A 1 . U
 F22B F -0.0983(8) 0.9694(4) 0.1954(4) 0.0521(19) Uani 0.699(19) 1 d A 2 . U

loop_
  _atom_site_aniso_label
  _atom_site_aniso_U_11
  _atom_site_aniso_U_22
  _atom_site_aniso_U_33
  _atom_site_aniso_U_23
  _atom_site_aniso_U_13
  _atom_site_aniso_U_12
 B1 0.022(2) 0.0142(17) 0.0142(18) 0.0012(14) -0.0012(15) 0.0017(15)
 C1 0.0242(17) 0.0087(14) 0.0146(15) -0.0004(12) 0.0003(13) -0.0013(13)
 C2 0.0276(18) 0.0125(15) 0.0147(16) -0.0004(12) 0.0045(13) -0.0015(13)
 C3 0.0250(18) 0.0103(14) 0.0156(16) -0.0002(12) -0.0013(13) -0.0019(13)
 C4 0.0215(18) 0.0159(16) 0.0235(17) -0.0018(13) -0.0002(14) -0.0015(14)
 C5 0.0254(19) 0.0184(16) 0.0183(17) -0.0025(13) 0.0020(14) -0.0006(14)
 C6 0.0307(19) 0.0137(15) 0.0114(15) 0.0012(12) -0.0006(13) -0.0003(14)
 C7 0.029(2) 0.0213(17) 0.0192(17) 0.0018(14) 0.0000(14) -0.0021(15)
 C8A 0.032(2) 0.043(3) 0.0213(19) 0.0015(18) 0.0024(16) 0.0050(19)
 C8B 0.032(2) 0.043(3) 0.0213(19) 0.0015(18) 0.0024(16) 0.0050(19)
 C9 0.0252(18) 0.0139(15) 0.0149(16) 0.0019(12) 0.0021(13) -0.0019(13)
 C10 0.0278(19) 0.0149(16) 0.0202(17) 0.0015(13) -0.0036(14) 0.0025(14)
 C11 0.035(2) 0.0147(16) 0.0225(18) -0.0014(13) -0.0015(15) 0.0034(15)
 C12 0.034(2) 0.0211(17) 0.0160(16) -0.0022(13) -0.0009(15) -0.0039(15)
 C13 0.0232(18) 0.0236(17) 0.0141(16) 0.0025(13) 0.0011(13) -0.0020(14)
 C14 0.0260(18) 0.0174(16) 0.0167(16) 0.0019(13) 0.0049(14) 0.0002(14)
 C15A 0.051(3) 0.024(2) 0.036(2) -0.0116(19) -0.012(2) 0.009(2)
 C15B 0.051(3) 0.024(2) 0.036(2) -0.0116(19) -0.012(2) 0.009(2)
 C16 0.0272(19) 0.034(2) 0.0167(17) -0.0020(15) -0.0015(14) 0.0011(16)
 C17 0.0145(16) 0.0183(16) 0.0183(16) 0.0011(13) 0.0017(12) 0.0007(13)
 C18 0.0269(19) 0.0193(16) 0.0165(16) 0.0028(13) 0.0031(14) -0.0037(14)
 C19 0.0264(19) 0.0189(17) 0.0245(18) -0.0044(14) 0.0064(14) -0.0056(14)
 C20 0.0221(18) 0.0123(15) 0.0305(19) 0.0007(14) 0.0057(15) -0.0004(13)
 C21 0.0150(16) 0.0190(16) 0.0225(17) 0.0067(13) 0.0030(13) 0.0013(13)
 C22 0.0181(17) 0.0172(16) 0.0173(16) -0.0003(13) 0.0012(13) 0.0020(13)
 C23 0.061(3) 0.0222(19) 0.029(2) -0.0056(16) 0.018(2) -0.0103(19)
 C24 0.0256(19) 0.0194(17) 0.0302(19) 0.0089(15) 0.0036(16) 0.0009(15)
 C25 0.0216(17) 0.0147(15) 0.0159(16) -0.0017(12) -0.0032(13) -0.0034(13)
 C26 0.0223(18) 0.0146(15) 0.0197(17) -0.0005(13) -0.0011(14) 0.0008(13)
 C27 0.0211(18) 0.0181(16) 0.0222(17) 0.0036(13) -0.0020(14) -0.0051(14)
 C28 0.0203(17) 0.0236(17) 0.0182(16) -0.0006(13) 0.0017(13) -0.0091(14)
 C29 0.0179(17) 0.0188(16) 0.0150(16) -0.0033(13) -0.0040(13) -0.0037(13)
 C30 0.0212(17) 0.0129(15) 0.0146(15) 0.0014(12) -0.0045(13) -0.0011(13)
 C31 0.0247(19) 0.0265(19) 0.0238(18) 0.0007(15) 0.0044(15) -0.0034(15)
 C32 0.029(2) 0.0224(18) 0.036(2) 0.0102(16) 0.0043(17) -0.0009(16)
 C33 0.038(2) 0.0108(16) 0.032(2) -0.0046(14) -0.0069(16) -0.0100(15)
 C34 0.047(2) 0.0208(18) 0.0240(19) -0.0017(14) -0.0122(17) -0.0090(17)
 C35 0.060(3) 0.0240(19) 0.0230(19) -0.0071(15) 0.0012(18) -0.0080(19)
 C36 0.049(3) 0.0218(19) 0.043(2) -0.0078(17) 0.0022(19) 0.0007(18)
 C37 0.046(2) 0.0116(16) 0.042(2) 0.0041(15) -0.0083(19) 0.0012(16)
 C38 0.051(2) 0.0105(16) 0.0248(18) 0.0031(14) -0.0040(17) -0.0063(16)
 C39 0.046(2) 0.0178(18) 0.048(2) 0.0049(17) 0.0040(19) -0.0036(17)
 C40 0.061(3) 0.036(2) 0.060(3) -0.001(2) 0.017(2) -0.005(2)
 C41 0.046(3) 0.033(2) 0.072(3) 0.013(2) -0.003(2) -0.010(2)
 C42 0.061(3) 0.045(3) 0.079(4) -0.009(3) 0.017(3) 0.013(2)
 C43A 0.035(3) 0.022(3) 0.013(2) 0.000(2) 0.000(2) 0.001(2)
 C43B 0.031(4) 0.031(4) 0.019(4) -0.002(3) -0.010(3) -0.001(4)
 C44A 0.035(4) 0.030(3) 0.020(3) -0.002(3) -0.004(3) -0.002(3)
 C44B 0.036(4) 0.032(4) 0.023(4) -0.003(4) -0.009(4) -0.001(4)
 C45A 0.031(3) 0.039(3) 0.022(3) 0.001(2) -0.005(2) -0.002(2)
 C45B 0.056(5) 0.038(4) 0.022(4) -0.006(4) -0.015(4) 0.011(4)
 C46 0.0202(17) 0.0145(16) 0.0255(18) 0.0012(13) 0.0078(14) -0.0039(13)
 C47 0.029(2) 0.0157(16) 0.033(2) 0.0015(14) 0.0030(16) 0.0000(15)
 C48 0.037(2) 0.025(2) 0.047(2) -0.0115(17) -0.0004(18) -0.0051(17)
 C49 0.033(2) 0.0166(18) 0.066(3) -0.0103(18) 0.010(2) -0.0018(16)
 C50 0.027(2) 0.0187(18) 0.066(3) 0.0029(18) 0.012(2) 0.0050(16)
 C51 0.0193(18) 0.0257(19) 0.040(2) 0.0026(16) 0.0023(16) 0.0021(15)
 C52 0.0215(18) 0.0172(16) 0.0239(17) 0.0049(13) -0.0001(14) 0.0019(14)
 C53 0.034(2) 0.0244(18) 0.033(2) 0.0010(16) -0.0060(16) -0.0018(16)
 C54 0.040(2) 0.026(2) 0.054(3) 0.0015(19) -0.017(2) -0.0101(18)
 C55 0.024(2) 0.026(2) 0.084(3) 0.014(2) 0.003(2) -0.0062(17)
 C56 0.036(2) 0.0235(19) 0.061(3) 0.0078(19) 0.024(2) 0.0004(17)
 C57 0.0271(19) 0.0171(16) 0.035(2) 0.0028(15) 0.0073(16) -0.0008(15)
 C58 0.0210(17) 0.0172(16) 0.0190(16) 0.0002(13) 0.0071(13) -0.0027(13)
 C59 0.036(2) 0.0225(17) 0.0170(17) 0.0014(14) 0.0015(15) -0.0023(15)
 C60 0.050(2) 0.0187(17) 0.028(2) 0.0048(15) 0.0008(18) -0.0030(17)
 C61 0.038(2) 0.0178(17) 0.033(2) -0.0055(15) 0.0069(17) -0.0099(16)
 C62 0.033(2) 0.031(2) 0.0251(19) -0.0029(16) -0.0020(16) -0.0133(17)
 C63 0.0274(19) 0.0227(18) 0.0240(18) 0.0037(14) -0.0027(15) -0.0071(15)
 C64 0.0211(17) 0.0195(16) 0.0149(16) 0.0009(13) 0.0021(13) 0.0002(14)
 C65 0.0266(19) 0.0220(17) 0.0274(18) -0.0020(14) 0.0050(15) -0.0061(15)
 C66 0.035(2) 0.0204(18) 0.0293(19) -0.0070(15) 0.0034(16) -0.0003(16)
 C67 0.030(2) 0.0262(18) 0.0229(18) 0.0001(15) 0.0057(15) 0.0060(16)
 C68 0.0215(18) 0.0252(18) 0.0255(18) 0.0044(15) 0.0050(14) -0.0024(15)
 C69 0.0238(18) 0.0174(16) 0.0229(17) 0.0011(14) -0.0011(14) -0.0011(14)
 C70 0.0254(18) 0.0229(17) 0.0153(16) 0.0006(13) -0.0012(14) -0.0034(14)
 C71 0.0228(18) 0.0290(19) 0.0213(17) 0.0096(14) 0.0024(14) 0.0022(15)
 F1A 0.029(5) 0.087(7) 0.030(5) -0.018(5) 0.011(4) -0.023(5)
 F1B 0.0283(19) 0.107(5) 0.0290(18) 0.014(3) 0.0090(14) 0.010(3)
 F2A 0.058(8) 0.045(5) 0.041(6) -0.009(4) 0.021(6) 0.008(5)
 F2B 0.057(4) 0.072(3) 0.027(3) -0.0150(19) 0.010(2) 0.014(2)
 F3A 0.038(7) 0.076(6) 0.038(6) 0.027(5) 0.011(5) -0.005(5)
 F3B 0.042(4) 0.065(3) 0.043(3) 0.023(2) 0.021(2) 0.008(3)
 F4 0.0367(12) 0.0346(11) 0.0239(10) 0.0019(9) -0.0079(9) 0.0113(10)
 F5 0.0459(13) 0.0460(13) 0.0220(10) 0.0161(9) -0.0046(10) -0.0149(11)
 F6 0.0465(13) 0.0293(11) 0.0195(10) -0.0070(8) -0.0021(9) 0.0002(10)
 F7A 0.072(5) 0.029(4) 0.058(6) -0.008(5) -0.008(5) 0.007(4)
 F7B 0.091(3) 0.0166(18) 0.055(4) -0.001(2) -0.021(3) 0.0124(19)
 F8A 0.063(6) 0.038(6) 0.032(4) -0.020(4) -0.002(4) 0.014(5)
 F8B 0.072(4) 0.038(3) 0.041(2) -0.024(2) -0.020(3) 0.018(3)
 F9A 0.052(6) 0.051(5) 0.052(7) -0.035(5) -0.014(4) 0.029(5)
 F9B 0.051(3) 0.052(3) 0.063(4) -0.036(3) -0.001(2) 0.018(3)
 F10 0.0357(13) 0.0908(19) 0.0280(12) 0.0003(12) 0.0051(10) 0.0226(13)
 F11 0.0455(14) 0.0301(12) 0.0436(13) 0.0103(10) -0.0152(11) 0.0030(10)
 F12 0.0366(12) 0.0377(12) 0.0300(11) -0.0046(9) -0.0126(9) -0.0024(10)
 F13A 0.087(5) 0.028(3) 0.077(4) 0.025(3) 0.040(4) 0.024(4)
 F13B 0.043(3) 0.041(3) 0.081(4) 0.043(3) 0.021(3) 0.018(2)
 F14A 0.041(3) 0.026(3) 0.067(4) 0.022(3) 0.019(3) -0.003(2)
 F14B 0.065(3) 0.025(3) 0.086(4) 0.025(3) -0.016(3) -0.013(2)
 F15A 0.065(4) 0.047(3) 0.063(4) 0.026(3) -0.030(3) -0.008(4)
 F15B 0.086(4) 0.051(3) 0.036(2) 0.024(2) 0.016(3) 0.023(3)
 F16 0.0582(16) 0.0559(15) 0.0528(15) 0.0162(12) 0.0352(13) 0.0189(13)
 F17 0.0284(12) 0.0477(14) 0.0568(15) -0.0144(12) -0.0149(11) 0.0127(10)
 F18 0.0319(12) 0.0273(11) 0.0638(15) -0.0198(10) 0.0118(11) -0.0029(9)
 F19A 0.034(3) 0.031(5) 0.024(4) 0.003(3) -0.004(2) 0.014(2)
 F19B 0.034(4) 0.035(6) 0.026(5) 0.004(4) -0.003(3) 0.000(3)
 F20A 0.038(4) 0.036(4) 0.025(3) 0.013(2) 0.017(3) 0.008(4)
 F20B 0.038(5) 0.042(5) 0.039(5) 0.018(3) 0.019(4) 0.005(4)
 F21A 0.056(6) 0.030(3) 0.038(4) 0.017(3) -0.001(4) -0.015(3)
 F21B 0.043(6) 0.022(3) 0.039(4) 0.015(3) 0.004(4) -0.003(3)
 F22A 0.077(6) 0.022(5) 0.041(6) -0.008(4) 0.032(5) -0.004(5)
 F24A 0.053(5) 0.046(7) 0.038(7) -0.018(5) 0.004(4) -0.013(4)
 F23B 0.075(4) 0.035(2) 0.017(2) -0.0042(17) 0.003(3) -0.018(3)
 Ni2 0.0214(2) 0.0134(2) 0.0146(2) 0.00211(16) 0.00079(16) 0.00073(17)
 P1 0.0215(4) 0.0161(4) 0.0165(4) 0.0030(3) 0.0021(3) 0.0000(3)
 P2 0.0203(4) 0.0158(4) 0.0166(4) 0.0000(3) 0.0027(3) -0.0017(3)
 Ru1 0.03572(17) 0.01382(13) 0.02176(15) 0.00286(11) -0.00858(12) -0.00149(12)
 S1 0.0286(5) 0.0240(4) 0.0353(5) -0.0013(4) -0.0079(4) 0.0064(4)
 S2 0.0356(5) 0.0220(4) 0.0186(4) 0.0067(3) -0.0001(4) -0.0056(4)
 F24B 0.078(3) 0.048(4) 0.034(3) -0.015(2) 0.010(2) -0.038(2)
 F23A 0.074(7) 0.034(5) 0.026(5) -0.009(4) 0.011(6) -0.021(6)
 F22B 0.092(4) 0.027(2) 0.043(3) -0.009(2) 0.035(3) 0.002(3)

_geom_special_details
;
 All esds (except the esd in the dihedral angle between two l.s. planes) 
 are estimated using the full covariance matrix.  The cell esds are taken 
 into account individually in the estimation of esds in distances, angles 
 and torsion angles; correlations between esds in cell parameters are only 
 used when they are defined by crystal symmetry.  An approximate (isotropic) 
 treatment of cell esds is used for estimating esds involving l.s. planes. 
;
loop_
  _geom_bond_atom_site_label_1
  _geom_bond_atom_site_label_2
  _geom_bond_distance
  _geom_bond_site_symmetry_2
  _geom_bond_publ_flag
 B1 C1 1.640(5) . ?
 B1 C9 1.645(4) . ?
 B1 C17 1.635(4) . ?
 B1 C25 1.639(5) . ?
 C1 C2 1.403(4) . ?
 C1 C6 1.394(4) . ?
 C2 C3 1.392(4) . ?
 C3 C4 1.374(4) . ?
 C3 C7 1.503(4) . ?
 C4 C5 1.390(4) . ?
 C5 C6 1.391(5) . ?
 C5 C8A 1.495(7) . ?
 C7 F4 1.339(3) . ?
 C7 F5 1.336(3) . ?
 C7 F6 1.340(3) . ?
 C8A F1A 1.336(7) . ?
 C8A F2A 1.341(7) . ?
 C8A F3A 1.338(7) . ?
 C8B F1B 1.330(5) . ?
 C8B F2B 1.343(5) . ?
 C8B F3B 1.331(5) . ?
 C9 C10 1.398(4) . ?
 C9 C14 1.399(4) . ?
 C10 C11 1.385(4) . ?
 C11 C12 1.380(5) . ?
 C11 C15A 1.497(7) . ?
 C11 C15B 1.493(5) . ?
 C12 C13 1.390(5) . ?
 C13 C14 1.390(4) . ?
 C13 C16 1.490(4) . ?
 C15A F7A 1.342(7) . ?
 C15A F8A 1.341(7) . ?
 C15A F9A 1.341(7) . ?
 C15B F7B 1.342(5) . ?
 C15B F8B 1.339(5) . ?
 C15B F9B 1.339(5) . ?
 C16 F10 1.335(3) . ?
 C16 F11 1.349(3) . ?
 C16 F12 1.336(3) . ?
 C17 C18 1.408(4) . ?
 C17 C22 1.392(4) . ?
 C18 C19 1.385(4) . ?
 C19 C20 1.388(4) . ?
 C19 C23 1.494(4) . ?
 C20 C21 1.384(4) . ?
 C21 C22 1.395(4) . ?
 C21 C24 1.497(4) . ?
 C23 F22A 1.341(7) . ?
 C23 F24A 1.336(7) . ?
 C23 F23B 1.340(5) . ?
 C23 F24B 1.341(5) . ?
 C23 F23A 1.337(14) . ?
 C23 F22B 1.336(5) . ?
 C24 F19A 1.344(6) . ?
 C24 F19B 1.341(6) . ?
 C24 F20A 1.344(6) . ?
 C24 F20B 1.336(6) . ?
 C24 F21A 1.338(6) . ?
 C24 F21B 1.340(6) . ?
 C25 C26 1.407(4) . ?
 C25 C30 1.393(4) . ?
 C26 C27 1.386(4) . ?
 C27 C28 1.385(5) . ?
 C27 C32 1.492(4) . ?
 C28 C29 1.388(4) . ?
 C29 C30 1.390(4) . ?
 C29 C31 1.491(4) . ?
 C31 F16 1.331(3) . ?
 C31 F17 1.335(3) . ?
 C31 F18 1.339(3) . ?
 C32 F13A 1.313(5) . ?
 C32 F13B 1.343(5) . ?
 C32 F14A 1.340(5) . ?
 C32 F14B 1.325(4) . ?
 C32 F15A 1.330(5) . ?
 C32 F15B 1.338(5) . ?
 C33 C34 1.424(5) . ?
 C33 C38 1.422(5) . ?
 C33 C39 1.512(5) . ?
 C33 Ru1 2.209(3) . ?
 C34 C35 1.397(6) . ?
 C34 Ru1 2.224(3) . ?
 C35 C36 1.424(5) . ?
 C35 Ru1 2.223(3) . ?
 C36 C37 1.408(5) . ?
 C36 C42 1.509(6) . ?
 C36 Ru1 2.215(4) . ?
 C37 C38 1.402(5) . ?
 C37 Ru1 2.171(3) . ?
 C38 Ru1 2.176(3) . ?
 C39 C40 1.523(6) . ?
 C39 C41 1.527(5) . ?
 C43A C44A 1.504(11) . ?
 C43A Ru1 2.145(5) . ?
 C43A S2 1.716(5) . ?
 C43B C44B 1.497(12) . ?
 C43B Ru1 2.128(7) . ?
 C43B S1 1.654(7) . ?
 C44A C45A 1.513(14) . ?
 C44B C45B 1.505(16) . ?
 C45A S1 1.898(5) . ?
 C45B S2 1.851(7) . ?
 C46 C47 1.391(5) . ?
 C46 C51 1.398(5) . ?
 C46 P1 1.817(3) . ?
 C47 C48 1.387(5) . ?
 C48 C49 1.378(5) . ?
 C49 C50 1.381(6) . ?
 C50 C51 1.384(5) . ?
 C52 C53 1.398(5) . ?
 C52 C57 1.392(5) . ?
 C52 P1 1.817(3) . ?
 C53 C54 1.381(5) . ?
 C54 C55 1.387(6) . ?
 C55 C56 1.373(6) . ?
 C56 C57 1.384(5) . ?
 C58 C59 1.392(4) . ?
 C58 C63 1.397(4) . ?
 C58 P2 1.820(3) . ?
 C59 C60 1.389(5) . ?
 C60 C61 1.377(5) . ?
 C61 C62 1.382(5) . ?
 C62 C63 1.380(5) . ?
 C64 C65 1.395(4) . ?
 C64 C69 1.389(4) . ?
 C64 P2 1.811(3) . ?
 C65 C66 1.383(5) . ?
 C66 C67 1.383(5) . ?
 C67 C68 1.383(5) . ?
 C68 C69 1.383(5) . ?
 C70 C71 1.524(5) . ?
 C70 P2 1.832(3) . ?
 C71 P1 1.860(3) . ?
 Ni2 P1 2.1821(9) . ?
 Ni2 P2 2.1483(9) . ?
 Ni2 Ru1 2.7940(5) . ?
 Ni2 S1 2.1879(10) . ?
 Ni2 S2 2.1941(9) . ?
 Ru1 S1 2.3809(10) . ?
 Ru1 S2 2.3953(9) . ?

loop_
  _geom_angle_atom_site_label_1
  _geom_angle_atom_site_label_2
  _geom_angle_atom_site_label_3
  _geom_angle
  _geom_angle_site_symmetry_1
  _geom_angle_site_symmetry_3
  _geom_angle_publ_flag
 C1 B1 C9 111.8(3) . . ?
 C17 B1 C1 104.3(2) . . ?
 C17 B1 C9 111.7(2) . . ?
 C17 B1 C25 111.3(3) . . ?
 C25 B1 C1 112.6(2) . . ?
 C25 B1 C9 105.3(2) . . ?
 C2 C1 B1 123.3(3) . . ?
 C6 C1 B1 120.8(3) . . ?
 C6 C1 C2 115.6(3) . . ?
 C3 C2 C1 122.0(3) . . ?
 C2 C3 C7 119.3(3) . . ?
 C4 C3 C2 121.2(3) . . ?
 C4 C3 C7 119.4(3) . . ?
 C3 C4 C5 118.0(3) . . ?
 C4 C5 C6 120.5(3) . . ?
 C4 C5 C8A 121.1(6) . . ?
 C6 C5 C8A 118.3(6) . . ?
 C5 C6 C1 122.6(3) . . ?
 F4 C7 C3 112.3(3) . . ?
 F4 C7 F6 105.9(2) . . ?
 F5 C7 C3 112.6(3) . . ?
 F5 C7 F4 107.1(2) . . ?
 F5 C7 F6 106.4(2) . . ?
 F6 C7 C3 112.0(2) . . ?
 F1A C8A C5 112.6(10) . . ?
 F1A C8A F2A 106.3(7) . . ?
 F1A C8A F3A 105.8(7) . . ?
 F2A C8A C5 111.6(13) . . ?
 F3A C8A C5 114.6(15) . . ?
 F3A C8A F2A 105.4(7) . . ?
 F1B C8B F2B 106.0(4) . . ?
 F1B C8B F3B 107.4(4) . . ?
 F3B C8B F2B 105.4(4) . . ?
 C10 C9 B1 123.6(3) . . ?
 C10 C9 C14 115.2(3) . . ?
 C14 C9 B1 121.1(3) . . ?
 C11 C10 C9 122.7(3) . . ?
 C10 C11 C15A 119.1(6) . . ?
 C10 C11 C15B 119.6(4) . . ?
 C12 C11 C10 121.0(3) . . ?
 C12 C11 C15A 119.6(6) . . ?
 C12 C11 C15B 119.2(4) . . ?
 C11 C12 C13 117.9(3) . . ?
 C12 C13 C14 120.6(3) . . ?
 C12 C13 C16 120.4(3) . . ?
 C14 C13 C16 118.9(3) . . ?
 C13 C14 C9 122.6(3) . . ?
 F7A C15A C11 109.3(13) . . ?
 F8A C15A C11 116.0(11) . . ?
 F8A C15A F7A 105.6(7) . . ?
 F8A C15A F9A 105.8(7) . . ?
 F9A C15A C11 113.8(19) . . ?
 F9A C15A F7A 105.5(7) . . ?
 F7B C15B C11 112.4(6) . . ?
 F8B C15B C11 113.2(5) . . ?
 F8B C15B F7B 105.8(4) . . ?
 F9B C15B C11 112.0(9) . . ?
 F9B C15B F7B 106.2(4) . . ?
 F9B C15B F8B 106.7(5) . . ?
 F10 C16 C13 112.8(3) . . ?
 F10 C16 F11 104.9(3) . . ?
 F10 C16 F12 106.9(3) . . ?
 F11 C16 C13 112.2(3) . . ?
 F12 C16 C13 113.8(3) . . ?
 F12 C16 F11 105.5(2) . . ?
 C18 C17 B1 119.8(3) . . ?
 C22 C17 B1 124.5(3) . . ?
 C22 C17 C18 115.4(3) . . ?
 C19 C18 C17 122.6(3) . . ?
 C18 C19 C20 120.4(3) . . ?
 C18 C19 C23 119.8(3) . . ?
 C20 C19 C23 119.7(3) . . ?
 C21 C20 C19 118.4(3) . . ?
 C20 C21 C22 120.6(3) . . ?
 C20 C21 C24 120.7(3) . . ?
 C22 C21 C24 118.7(3) . . ?
 C17 C22 C21 122.5(3) . . ?
 F22A C23 C19 112.9(13) . . ?
 F24A C23 C19 114.5(10) . . ?
 F24A C23 F22A 105.9(7) . . ?
 F24A C23 F23A 107.3(9) . . ?
 F23B C23 C19 114.8(5) . . ?
 F23B C23 F24B 106.0(4) . . ?
 F24B C23 C19 110.7(5) . . ?
 F23A C23 C19 110.2(11) . . ?
 F22B C23 C19 111.9(6) . . ?
 F22B C23 F23B 106.6(5) . . ?
 F22B C23 F24B 106.2(4) . . ?
 F19A C24 C21 111.9(8) . . ?
 F19A C24 F20A 105.1(5) . . ?
 F19B C24 C21 114.0(10) . . ?
 F20A C24 C21 112.5(7) . . ?
 F20B C24 C21 112.4(10) . . ?
 F20B C24 F19B 106.2(6) . . ?
 F20B C24 F21B 106.4(6) . . ?
 F21A C24 C21 114.3(9) . . ?
 F21A C24 F19A 106.3(6) . . ?
 F21A C24 F20A 106.2(6) . . ?
 F21B C24 C21 111.2(11) . . ?
 F21B C24 F19B 106.2(6) . . ?
 C26 C25 B1 121.6(3) . . ?
 C30 C25 B1 123.1(3) . . ?
 C30 C25 C26 115.2(3) . . ?
 C27 C26 C25 122.2(3) . . ?
 C26 C27 C32 120.1(3) . . ?
 C28 C27 C26 121.2(3) . . ?
 C28 C27 C32 118.7(3) . . ?
 C27 C28 C29 118.0(3) . . ?
 C28 C29 C30 120.3(3) . . ?
 C28 C29 C31 120.7(3) . . ?
 C30 C29 C31 118.9(3) . . ?
 C29 C30 C25 123.1(3) . . ?
 F16 C31 C29 113.5(3) . . ?
 F16 C31 F17 106.7(3) . . ?
 F16 C31 F18 106.0(3) . . ?
 F17 C31 C29 112.5(3) . . ?
 F17 C31 F18 105.1(2) . . ?
 F18 C31 C29 112.4(3) . . ?
 F13A C32 C27 113.5(4) . . ?
 F13A C32 F14A 106.8(4) . . ?
 F13A C32 F15A 108.1(5) . . ?
 F13B C32 C27 113.9(3) . . ?
 F14A C32 C27 112.5(4) . . ?
 F14B C32 C27 112.7(3) . . ?
 F14B C32 F13B 105.5(4) . . ?
 F14B C32 F15B 106.8(4) . . ?
 F15A C32 C27 111.0(4) . . ?
 F15A C32 F14A 104.5(4) . . ?
 F15B C32 C27 113.2(4) . . ?
 F15B C32 F13B 103.9(4) . . ?
 C34 C33 C39 119.1(3) . . ?
 C34 C33 Ru1 71.9(2) . . ?
 C38 C33 C34 117.6(3) . . ?
 C38 C33 C39 123.3(3) . . ?
 C38 C33 Ru1 69.9(2) . . ?
 C39 C33 Ru1 129.1(2) . . ?
 C33 C34 Ru1 70.68(19) . . ?
 C35 C34 C33 120.9(3) . . ?
 C35 C34 Ru1 71.7(2) . . ?
 C34 C35 C36 121.3(4) . . ?
 C34 C35 Ru1 71.7(2) . . ?
 C36 C35 Ru1 71.0(2) . . ?
 C35 C36 C42 120.7(4) . . ?
 C35 C36 Ru1 71.6(2) . . ?
 C37 C36 C35 117.8(4) . . ?
 C37 C36 C42 121.5(4) . . ?
 C37 C36 Ru1 69.6(2) . . ?
 C42 C36 Ru1 128.9(3) . . ?
 C36 C37 Ru1 73.0(2) . . ?
 C38 C37 C36 121.4(3) . . ?
 C38 C37 Ru1 71.40(19) . . ?
 C33 C38 Ru1 72.31(19) . . ?
 C37 C38 C33 121.0(3) . . ?
 C37 C38 Ru1 71.0(2) . . ?
 C33 C39 C40 113.8(3) . . ?
 C33 C39 C41 109.2(3) . . ?
 C40 C39 C41 111.2(4) . . ?
 C44A C43A Ru1 117.2(5) . . ?
 C44A C43A S2 120.7(5) . . ?
 S2 C43A Ru1 75.79(18) . . ?
 C44B C43B Ru1 117.2(10) . . ?
 C44B C43B S1 116.9(10) . . ?
 S1 C43B Ru1 76.9(3) . . ?
 C43A C44A C45A 113.6(6) . . ?
 C43B C44B C45B 113.8(10) . . ?
 C44A C45A S1 114.4(5) . . ?
 C44B C45B S2 119.4(7) . . ?
 C47 C46 C51 119.1(3) . . ?
 C47 C46 P1 121.0(2) . . ?
 C51 C46 P1 119.8(3) . . ?
 C48 C47 C46 120.3(3) . . ?
 C49 C48 C47 120.0(4) . . ?
 C48 C49 C50 120.2(3) . . ?
 C49 C50 C51 120.3(3) . . ?
 C50 C51 C46 120.0(3) . . ?
 C53 C52 P1 120.5(3) . . ?
 C57 C52 C53 119.1(3) . . ?
 C57 C52 P1 120.4(2) . . ?
 C54 C53 C52 120.0(4) . . ?
 C53 C54 C55 120.2(4) . . ?
 C56 C55 C54 120.2(4) . . ?
 C55 C56 C57 120.1(4) . . ?
 C56 C57 C52 120.4(3) . . ?
 C59 C58 C63 119.1(3) . . ?
 C59 C58 P2 122.1(2) . . ?
 C63 C58 P2 118.4(2) . . ?
 C60 C59 C58 119.9(3) . . ?
 C61 C60 C59 120.4(3) . . ?
 C60 C61 C62 120.1(3) . . ?
 C63 C62 C61 120.1(3) . . ?
 C62 C63 C58 120.4(3) . . ?
 C65 C64 P2 118.2(2) . . ?
 C69 C64 C65 119.3(3) . . ?
 C69 C64 P2 122.5(2) . . ?
 C66 C65 C64 120.0(3) . . ?
 C67 C66 C65 120.2(3) . . ?
 C66 C67 C68 120.0(3) . . ?
 C67 C68 C69 120.1(3) . . ?
 C68 C69 C64 120.3(3) . . ?
 C71 C70 P2 108.2(2) . . ?
 C70 C71 P1 110.0(2) . . ?
 P1 Ni2 Ru1 124.72(3) . . ?
 P1 Ni2 S1 177.30(4) . . ?
 P1 Ni2 S2 90.15(4) . . ?
 P2 Ni2 P1 84.76(3) . . ?
 P2 Ni2 Ru1 130.18(3) . . ?
 P2 Ni2 S1 93.25(4) . . ?
 P2 Ni2 S2 173.82(4) . . ?
 S1 Ni2 Ru1 55.50(3) . . ?
 S1 Ni2 S2 91.94(4) . . ?
 S2 Ni2 Ru1 55.85(2) . . ?
 C46 P1 C71 103.46(15) . . ?
 C46 P1 Ni2 114.04(11) . . ?
 C52 P1 C46 105.84(15) . . ?
 C52 P1 C71 104.62(15) . . ?
 C52 P1 Ni2 117.44(10) . . ?
 C71 P1 Ni2 110.15(11) . . ?
 C58 P2 C70 105.49(15) . . ?
 C58 P2 Ni2 108.60(10) . . ?
 C64 P2 C58 107.84(15) . . ?
 C64 P2 C70 104.17(15) . . ?
 C64 P2 Ni2 122.66(10) . . ?
 C70 P2 Ni2 106.79(11) . . ?
 C33 Ru1 C34 37.47(13) . . ?
 C33 Ru1 C35 67.24(14) . . ?
 C33 Ru1 C36 80.80(14) . . ?
 C33 Ru1 Ni2 120.13(9) . . ?
 C33 Ru1 S1 165.54(9) . . ?
 C33 Ru1 S2 96.55(9) . . ?
 C34 Ru1 Ni2 101.44(9) . . ?
 C34 Ru1 S1 129.40(10) . . ?
 C34 Ru1 S2 109.56(10) . . ?
 C35 Ru1 C34 36.60(14) . . ?
 C35 Ru1 Ni2 105.77(10) . . ?
 C35 Ru1 S1 104.28(11) . . ?
 C35 Ru1 S2 139.79(11) . . ?
 C36 Ru1 C34 67.24(15) . . ?
 C36 Ru1 C35 37.41(14) . . ?
 C36 Ru1 Ni2 130.66(11) . . ?
 C36 Ru1 S1 99.57(11) . . ?
 C36 Ru1 S2 176.80(11) . . ?
 C37 Ru1 C33 68.27(14) . . ?
 C37 Ru1 C34 79.32(14) . . ?
 C37 Ru1 C35 66.95(14) . . ?
 C37 Ru1 C36 37.42(14) . . ?
 C37 Ru1 C38 37.63(14) . . ?
 C37 Ru1 Ni2 166.85(11) . . ?
 C37 Ru1 S1 120.37(11) . . ?
 C37 Ru1 S2 143.04(11) . . ?
 C38 Ru1 C33 37.84(13) . . ?
 C38 Ru1 C34 67.19(13) . . ?
 C38 Ru1 C35 79.12(14) . . ?
 C38 Ru1 C36 67.82(15) . . ?
 C38 Ru1 Ni2 154.48(10) . . ?
 C38 Ru1 S1 155.08(10) . . ?
 C38 Ru1 S2 111.12(10) . . ?
 C43A Ru1 C33 106.98(18) . . ?
 C43A Ru1 C34 140.33(19) . . ?
 C43A Ru1 C35 172.23(18) . . ?
 C43A Ru1 C36 138.49(17) . . ?
 C43A Ru1 C37 106.42(17) . . ?
 C43A Ru1 C38 93.15(17) . . ?
 C43A Ru1 Ni2 81.52(14) . . ?
 C43A Ru1 S1 82.44(16) . . ?
 C43A Ru1 S2 43.99(13) . . ?
 C43B Ru1 C33 151.8(2) . . ?
 C43B Ru1 C34 164.4(3) . . ?
 C43B Ru1 C35 127.8(3) . . ?
 C43B Ru1 C36 99.2(3) . . ?
 C43B Ru1 C37 94.5(3) . . ?
 C43B Ru1 C38 116.0(2) . . ?
 C43B Ru1 C43A 55.1(3) . . ?
 C43B Ru1 Ni2 81.4(2) . . ?
 C43B Ru1 S1 42.6(2) . . ?
 C43B Ru1 S2 84.0(3) . . ?
 S1 Ru1 Ni2 49.23(2) . . ?
 S1 Ru1 S2 82.54(3) . . ?
 S2 Ru1 Ni2 49.29(2) . . ?
 C43B S1 Ni2 114.7(3) . . ?
 C43B S1 Ru1 60.5(3) . . ?
 C45A S1 Ni2 101.49(19) . . ?
 C45A S1 Ru1 101.11(18) . . ?
 Ni2 S1 Ru1 75.27(3) . . ?
 C43A S2 Ni2 112.49(19) . . ?
 C43A S2 Ru1 60.22(16) . . ?
 C45B S2 Ni2 104.1(4) . . ?
 C45B S2 Ru1 97.5(3) . . ?
 Ni2 S2 Ru1 74.86(3) . . ?

_audit_update_record
;
? 
;

#===END
